# Supplementary material for: Organic pollutants in compost and digestate. : Part 1. Polychlorinated biphenyls, polycyclic aromatic hydrocarbons and molecular markers
Source: Royal Society of Chemistry journal article supplement (doi:10.1039/b617101j), 2007-01-01
Supplement: b617101j.pdf [file b617101j.pdf]

## Supporting Information to the Manuscript

# Organic pollutants in compost and digestate; 1. Polychlorinated biphenyls, polycyclic aromatic hydrocarbons and molecular markers

### Text S1

#### The composting and digestion process

On composting plants, delivered green and kitchen waste is chopped and mixed with woody material to achieve an adequate porosity of the substrate for an aerobic degradation process. Different systems for composting are employed: open triangle and table windrows, aerated boxes and trenches etc. Independently of the system, the substrate is regularly turned or aerated during the process to guarantee sufficient oxygen supply and consequently an aerobic decomposition. If necessary, water is added to achieve efficient degradation. The composting process can be divided in four stages according to the temperature evolution: mesophilic, thermophilic, cooling down and maturation<sup>1</sup>. It usually lasts between five and eight weeks. Finished compost is screened according to requirements of the application<sup>2</sup>.

Different systems are employed for digestion (i.e., anaerobic treatment coupled with biogas production): thermophilic, mesophilic, solid and liquid digestion. The most common system for the treatment of organic kitchen and green waste is thermophilic solid digestion<sup>3</sup>. In this process, input materials are chopped and ferrous impurities removed. They are mixed with recycled presswater (definition see below) and fresh water to achieve a pumpable mixture, which is then inoculated with digestate. This substrate is pumped to a fermenter, where it is continuously forwarded by an archimedic spiral. Thermophilic digestion lasts about two weeks at a temperature of approximately 55 °C. The output material undergoes solid-liquid separation in a drainage system (press). The resulting solid fraction is often submitted to aerobic treatment similar techniques as for composting, whereas the liquid fraction (presswater) is stored in a tank until application to agricultural fields.

### Text S2

#### Conversion of characteristic PAH to ratios in input material

To account for altered characteristic PAH ratios between emission and input material of compost, rectification factor as defined by Zhang et al.<sup>4</sup> for air particles were applied. Stable ratios during composting of the form  $x/(x+y)$  (i.e. FLT/(FLT&PYR), BaA(BaA&CHR), (IPY/(IYP&BPE)) were converted to emission source ratios ( $r_{\text{emission source}}$ ) as follows:

$$r_{\text{emission source}} = r_{\text{compost}} / (RF_{\text{Zhang}} + r_{\text{compost}} - RF_{\text{Zhang}} * r_{\text{compost}})$$

where,  $r_{\text{compost}}$  is the PAH ratio in compost and  $RF_{\text{Zhang}}$  is the rectification factor (for ANT/PHE 2.16, for FLT/PYR 1.68, for BaA/CHR 0.59, for IPY/BPE 0.92). BaP/BPE ratios were converted by deviding the BaP/BPE<sub>compost</sub> by  $RF_{\text{Zhang}} \text{BaP/BPE}$  (0.60).

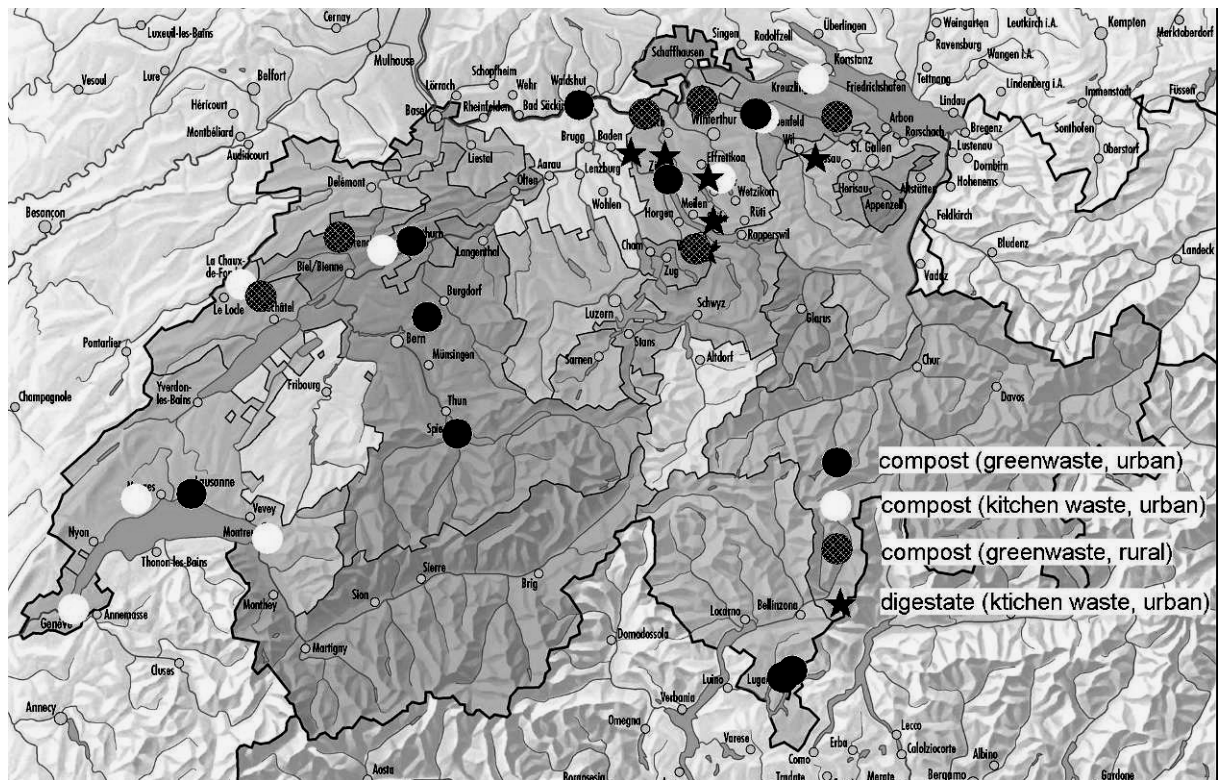

Figure S1: Sampling locations (n=31) of compost and digestate in Switzerland, some plants were sampled once, others three times to account for different seasons. For further information on individual plants, see Table 1, status May 2006

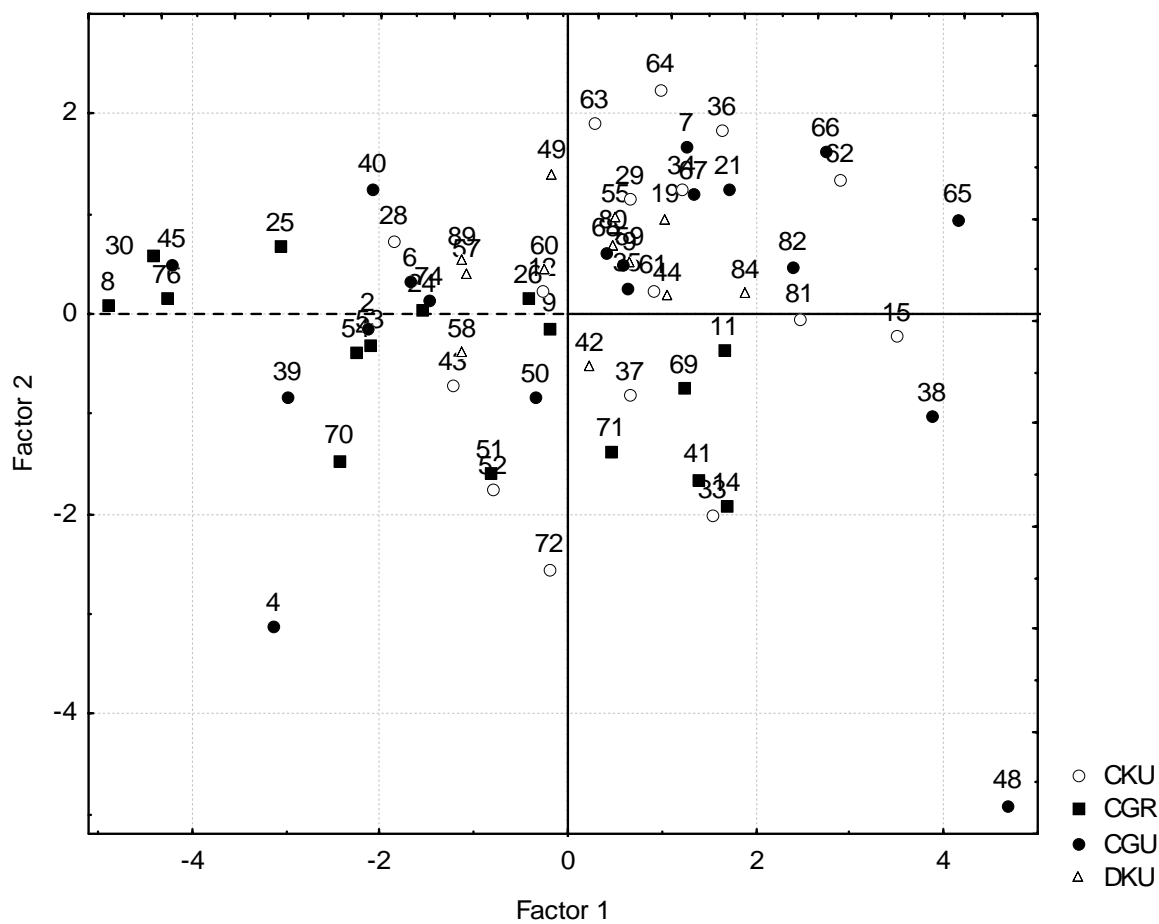

Figure S2: Factor 1 and 2 of the principal component analysis of the ratios of individual PCB (PCB 52, 95, 101, 118, 132, 138, 149, 153, 174, 180) to the total sum of 10PCB in Swiss compost and digestate (n=63). Number = sample number specified in Table 1, CKU: compost containing organic kitchen and green waste in the input material originating from urban areas, CGR: green waste compost originating from rural areas, CGU: green waste compost originating from urban areas, DKU: digestate derived from urban green and organic kitchen waste.

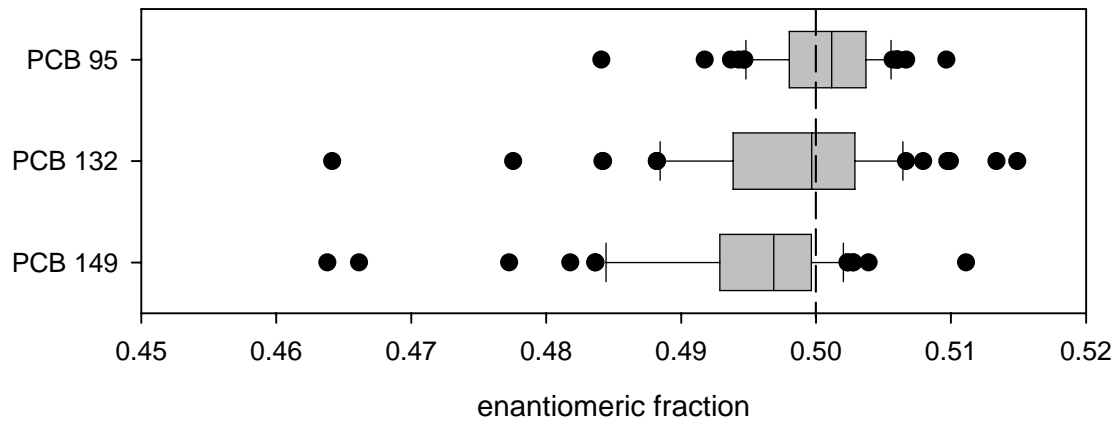

Figure S3: Enantiomeric fractions (EFs) of three antipisomeric PCB in Swiss compost and digestate (n=68).

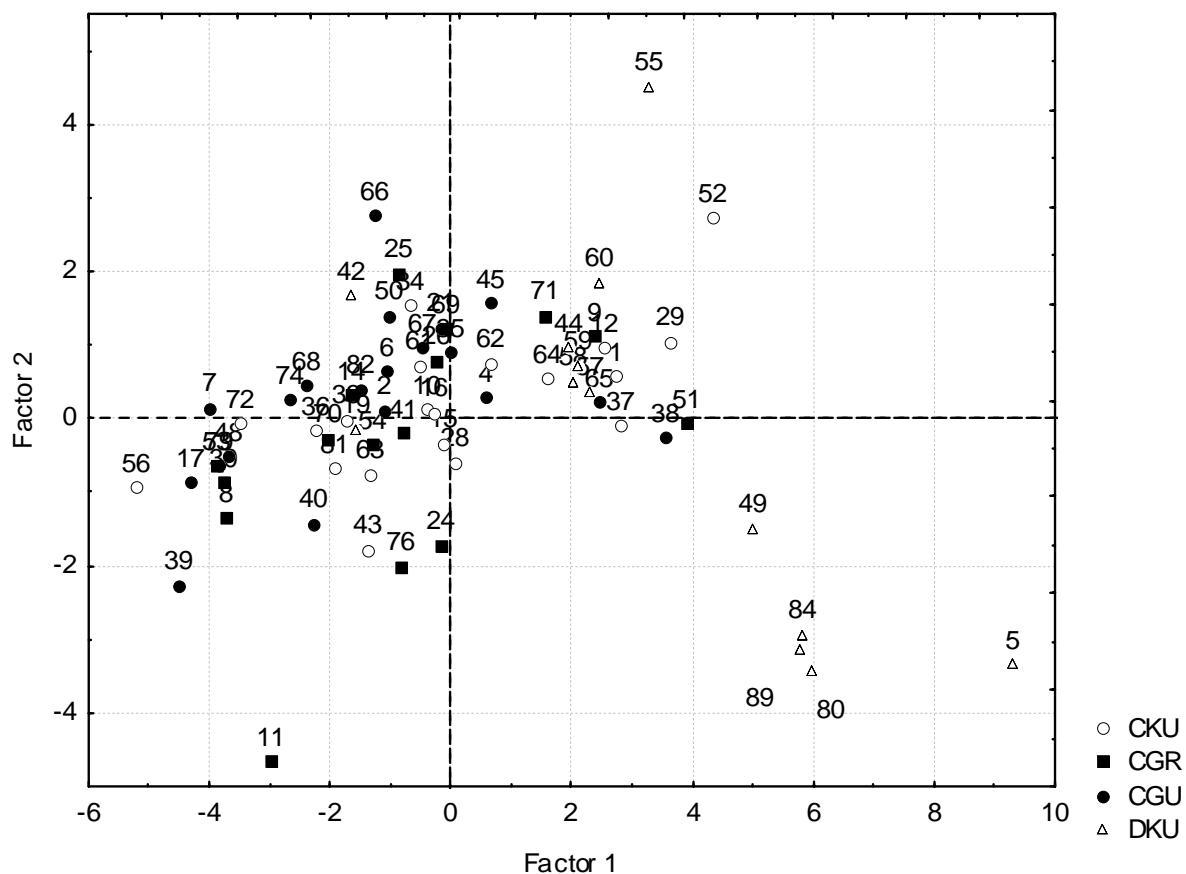

Figure S4: Factor 1 and 2 of the principal component analysis of the ratios of single PAH compounds to the total sum (Sum of 16 EPA PAH except dibenz[*a,h*]anthracene) in Swiss compost and digestate (n=69). Number = sample number specified in Table 1, CKU: compost containing organic kitchen and green waste in the input material originating from urban areas, CGR: green waste compost originating from rural areas, CGU: green waste compost originating from urban areas, DKU: digestate derived from urban green and organic kitchen waste.

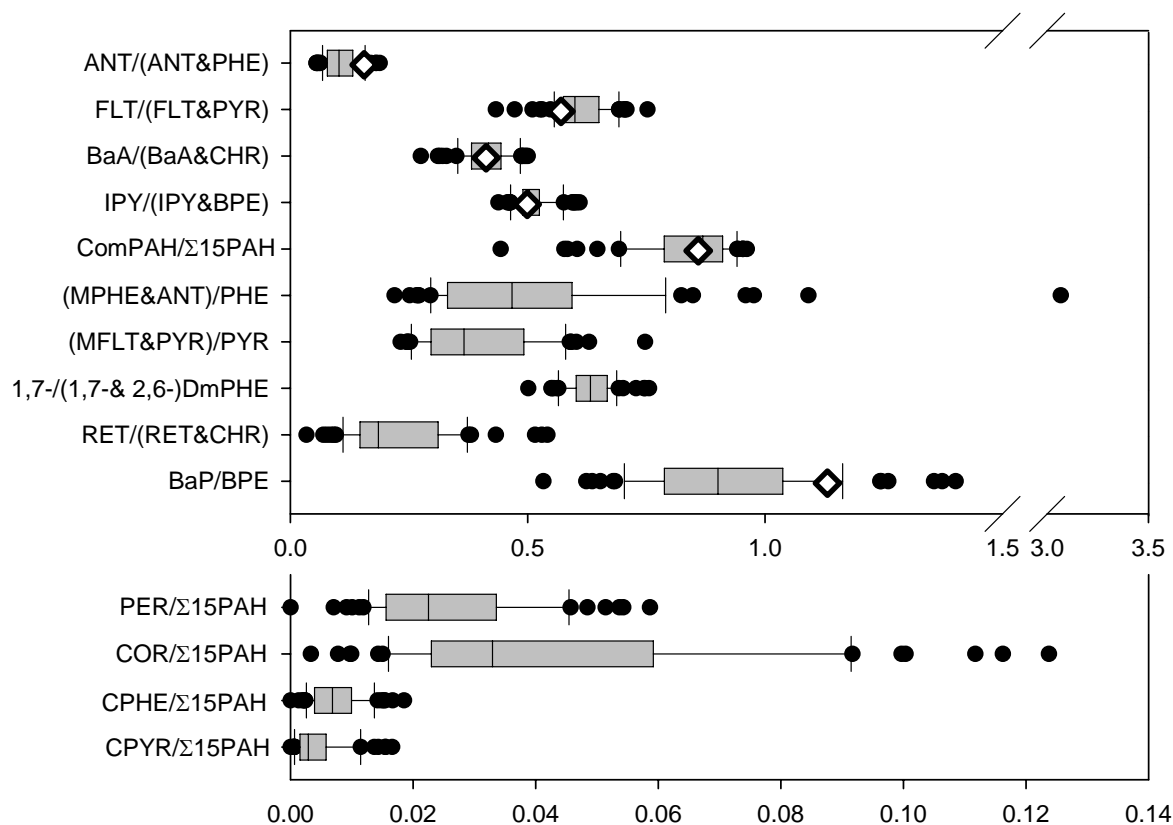

Figure S5: Characteristic PAH ratios in Swiss compost and digestate (n=69, line: median; box: 25<sup>th</sup> and 75<sup>th</sup> percentile; lines with whiskers 10<sup>th</sup> and 90<sup>th</sup> percentile, dots: outliers, diamond: median literature value, ANT: anthracene, PHE: phenanthrene, fluoranthene (FLT), pyrene (PYR), benzo[*a*]anthracene (BaA), chrysene (CHR), indeno[1,2,3-*cd*]pyrene (IPY), benzo[*ghi*]perylene (BPE), ComPAH: sum of FLT, PYR, BaA, CHR, benzo[*b*]fluoranthene, benzo[*k*]fluoranthene, benzo[*e*]pyrene (not included here),  $\Sigma$ 15PAH: sum of 16 EPA PAH except dibenzo[*a,h*]anthracene, MPHE&ANT: methylated phenanthrene and anthracene, MFLT&PYR: methylated fluoranthene and pyrene, 1,7-/(1,7-&2,6-DmPHE): 1,7-/(1,7-&2,6-dimethylphenanthrene), RET: retene, benzo[*a*]pyrene (BaP), benzo[*ghi*]perylene (BPE), PER: perylene, COR: coronene COR, CPHE: 4-H cyclopenta[*def*]PHE, CPYR: cyclopenta[*cd*]PYR.

Supplementary Material (ESI) for Journal of Environmental Monitoring  
This journal is © The Royal Society of Chemistry 2007

Table S1: Sample description, PCB, PAH, heavy metal and nutrient contents of compost, digestate and presswater samples in Switzerland

| Sample No.                                                             | 1               | 2      | 4      | 5               | 6               | 7      | 8      | 9               | 10              | 11     |
|------------------------------------------------------------------------|-----------------|--------|--------|-----------------|-----------------|--------|--------|-----------------|-----------------|--------|
| Product <sup>a</sup>                                                   | Com             | Com    | Com    | Dig             | Com             | Com    | Com    | Com             | Com             | Com    |
| Plant code and number <sup>b</sup>                                     | CKU01           | CGU01  | CGU10  | DKU01           | CGU03           | CGU03  | CGR01  | CGR12           | CKU02           | CGR06  |
| Input material <sup>c</sup>                                            | kw, gw,<br>iw   | gw, iw | gw, iw | kw, gw,<br>iw   | gw              | gw     | gw     | gw              | kw, gw          | gw     |
| Origin of input material <sup>d</sup>                                  | urban           | urban  | urban  | urban           | urban           | urban  | rural  | rural           | urban           | rural  |
| Season <sup>e</sup>                                                    | winter          | winter | winter | winter          | winter          | summer | winter | summer          | winter          | winter |
| Plant type <sup>f</sup>                                                | twl             | twl    | tbw    | tad             | twh             | twh    | twl    | ab              | ab              | fec    |
| Process duration (days) <sup>h</sup>                                   | 53              | 53     | 118    | 42              | 35              | 231    | 56     | 28              | 77              | 98     |
| Water content [% ww]                                                   | 50              | 46     | 46     | 49              | 54              | 42     | 48     | 45              | 45              | 58     |
| Org matter content [% dw]                                              | 62              | 36     | 30     | 46              | 55              | 37     | 36     | 47              | 57              | 53     |
| Impurity content [% dw]                                                | 0.15            | 0.076  | 0.065  | 0.32            | 0.25            | 0.41   | 0.30   | 0.18            | 0.062           | 0.43   |
| Maturity (NO <sub>3</sub> <sup>-</sup> /NH <sub>4</sub> <sup>+</sup> ) | nd <sup>i</sup> | 15     | 10     | nd <sup>i</sup> | nd <sup>i</sup> | 2.2    | 5.9    | nd <sup>i</sup> | nd <sup>i</sup> | 15     |
| Particle size [mm] <sup>j</sup>                                        | <40             | <10    | <20    | <40             | <40             | <20    | <25    | not             | <20             | not    |
| <b>PCB (µg/kg<sub>dw</sub>)</b>                                        |                 |        |        |                 |                 |        |        |                 |                 |        |
| PCB 28                                                                 | nd              | nd     | 7.9    | nd              | nd              | nd     | nd     | nd              | nd              | nd     |
| PCB 52                                                                 | 0.97            | 2.0    | 8.8    | 1.9             | 3.4             | 6.2    | 2.2    | 3.1             | 2.4             | 2.1    |
| PCB 95                                                                 | na              | 2.2    | 7.7    | na              | 4.5             | 9.9    | 6.1    | 4.2             | na              | 1.9    |
| PCB 101                                                                | 2.8             | 3.1    | 8.5    | 4.4             | 6.0             | 13     | 7.7    | 5.5             | 6.1             | 2.7    |
| PCB 118                                                                | 1.6             | 2.3    | 4.8    | 3.6             | 4.9             | 9.2    | 3.6    | 3.8             | 5.9             | 3.6    |
| PCB 132                                                                | na              | 2.2    | 5.4    | na              | 4.9             | 8.0    | 7.0    | 3.7             | na              | 1.9    |
| PCB 138                                                                | 4.5             | 4.7    | 11     | 7.8             | 8.6             | 13     | 12     | 4.7             | 7.8             | 3.2    |
| PCB 149                                                                | na              | 3.8    | 12     | na              | 6.3             | 11     | 11     | 4.8             | na              | 2.2    |
| PCB 153                                                                | 3.3             | 5.4    | 19     | 5.2             | 10              | 17     | 16     | 7.6             | 6.7             | 3.9    |
| PCB 174                                                                | na              | 1.3    | 4.0    | na              | 2.4             | 3.1    | 3.9    | 2.1             | na              | 0.80   |
| PCB 180                                                                | 1.5             | 2.8    | 14     | 2.5             | 6.2             | 7.5    | 12     | 4.4             | 3.7             | 1.7    |
| EF PCB 95                                                              | 0.50            | 0.50   | 0.50   | 0.51            | 0.50            | 0.50   | 0.51   | 0.50            | 0.49            | 0.50   |
| EF PCB 132                                                             | 0.50            | 0.50   | 0.50   | 0.50            | 0.51            | 0.50   | 0.50   | 0.50            | 0.50            | 0.51   |
| EF PCB 149                                                             | 0.49            | 0.50   | 0.49   | 0.49            | 0.50            | 0.50   | 0.50   | 0.49            | 0.48            | 0.48   |
| <b>PAH (µg/kg<sub>dw</sub>)</b>                                        |                 |        |        |                 |                 |        |        |                 |                 |        |
| NAP                                                                    | 19              | 16     | 32     | 120             | 27              | 12     | 42     | 25              | 48              | 91     |
| ACY                                                                    | 3.0             | 2.3    | 5.7    | 11              | 3.8             | 2.7    | 4.9    | 2.3             | 14              | 2.1    |
| ACE                                                                    | 17              | 6.8    | 50     | 740             | 36              | 4.5    | 7.9    | 38              | 17              | 1.1    |
| FLU                                                                    | 43              | 13     | 61     | 1000            | 18              | 4.8    | 12     | 80              | 46              | 4.2    |
| PHE                                                                    | 350             | 160    | 340    | 4200            | 150             | 62     | 150    | 770             | 910             | 69     |
| ANT                                                                    | 45              | 18     | 64     | 700             | 29              | 10     | 21     | 45              | 140             | 5.9    |
| FLT                                                                    | 620             | 410    | 760    | 2400            | 710             | 360    | 430    | 900             | 1700            | 170    |
| PYR                                                                    | 260             | 170    | 600    | 1400            | 380             | 230    | 220    | 600             | 1200            | 54     |
| BaA                                                                    | 130             | 130    | 270    | 350             | 240             | 250    | 240    | 240             | 650             | 54     |
| CHR                                                                    | 180             | 220    | 360    | 360             | 340             | 460    | 380    | 330             | 680             | 120    |
| BbF                                                                    | 130             | 210    | 370    | 240             | 340             | 320    | 440    | 240             | 760             | 120    |
| BkF                                                                    | 69              | 93     | 210    | 130             | 190             | 150    | 230    | 130             | 530             | 64     |
| BaP                                                                    | 83              | 100    | 190    | 200             | 190             | 160    | 220    | 170             | 590             | 70     |
| IPY                                                                    | 96              | 130    | 190    | 140             | 190             | 260    | 230    | 200             | 600             | 110    |
| BPE                                                                    | 110             | 140    | 220    | 170             | 200             | 230    | 240    | 190             | 530             | 100    |
| CPHE                                                                   | 29              | 13     | 45     | na              | 30              | 6.0    | 9.7    | 54              | 64              | 7.0    |
| RET                                                                    | 89              | 170    | 210    | 56              | 93              | 71     | 65     | 190             | 150             | 28     |
| CPYR                                                                   | 6.7             | 5.0    | 6.3    | na              | 6.6             | 8.6    | 5.3    | 9.6             | 33              | 9.3    |
| PER                                                                    | 32              | 33     | 63     | na              | 64              | 54     | 70     | 55              | 200             | 28     |
| COR                                                                    | 62              | 67     | 110    | 41              | 90              | 99     | 110    | 76              | 210             | 45     |
| (MPHE/ANT)/PHE [-]                                                     | 0.37            | 0.56   | 0.96   | 0.25            | 0.98            | 0.82   | 0.54   | 0.33            | 0.36            | 0.35   |
| (MFLT/PYR)/PYR [-]                                                     | 0.35            | 0.50   | 0.39   | 0.31            | 0.42            | 0.58   | 0.63   | 0.30            | 0.25            | 0.57   |
| 1,7-(1,7-&2,6-DmPHE) [-]                                               | 0.66            | 0.68   | 0.60   | 0.50            | 0.65            | 0.65   | 0.68   | 0.64            | 0.64            | 0.70   |
| <b>Heavy metals (mg/kg<sub>dw</sub>)</b>                               |                 |        |        |                 |                 |        |        |                 |                 |        |
| Cd                                                                     | 0.13            | 0.13   | 0.025  | nd              | 0.081           | 0.1    | 0.021  | 0.34            | 0.53            | 0.12   |
| Co                                                                     | 2.2             | 3.9    | 3.6    | 3.2             | 3.2             | 4.4    | 3.8    | 5.1             | 3.6             | 3.6    |
| Cr                                                                     | 11              | 16     | 23     | 14              | 13              | 21     | 17     | 25              | 15              | 16     |
| Cu                                                                     | 31              | 47     | 86     | 35              | 43              | 60     | 37     | 71              | 55              | 40     |
| Ni                                                                     | 9.5             | 14     | 12     | 11              | 12              | 17     | 14     | 21              | 11              | 13     |
| Pb                                                                     | 19              | 33     | 30     | 22              | 59              | 66     | 26     | 54              | 100             | 30     |
| Zn                                                                     | 76              | 110    | 150    | 89              | 130             | 190    | 120    | 190             | 250             | 140    |

| <b>Nutrients (g/kg<sub>dw</sub>)</b>        |      |      |      |      |      |      |      |      |      |      |
|---------------------------------------------|------|------|------|------|------|------|------|------|------|------|
| N                                           | 15   | 14   | 9.2  | 11   | 12   | 19   | 15   | 14   | 19   | 22   |
| P                                           | 1.8  | 2.3  | 3.9  | 2.6  | 1.7  | 3.3  | 2.3  | 2.5  | 2.8  | 3.3  |
| K                                           | 6.9  | 8.7  | 6.4  | 7.7  | 5.7  | 14   | 9.9  | 9.1  | 14   | 13   |
| Mg                                          | 4.1  | 4.9  | 5.0  | 6.5  | 5.8  | 8.8  | 6.9  | 4.0  | 4.1  | 6.9  |
| Ca                                          | 68   | 82   | 92   | 65   | 50   | 64   | 64   | 68   | 41   | 64   |
| <b>Further elements (g/kg<sub>dw</sub>)</b> |      |      |      |      |      |      |      |      |      |      |
| Fe                                          | 4.5  | 8.9  | 11.0 | 7.6  | 7.1  | 10   | 9.2  | 11   | 8.2  | 9.9  |
| Mn                                          | 0.31 | 0.44 | 0.34 | 0.40 | 0.34 | 0.44 | 0.69 | 0.43 | 0.37 | 0.46 |
| Na                                          | 0.64 | 0.55 | 0.47 | 1.60 | 0.34 | 0.58 | 0.61 | 0.59 | 0.71 | 0.74 |
| <b>Ancillary data</b>                       |      |      |      |      |      |      |      |      |      |      |
| pH                                          | 8.3  | 8.4  | 8.2  | 8.3  | 8.3  | 8.1  | 8.2  | 7.8  | 8.2  | 8.2  |
| Conductivity (μS/cm)                        | 1400 | 1800 | 1800 | 3000 | 920  | 3600 | 2600 | 1800 | 2100 | 2500 |

- a) Com: compost, Dig: digestate, all digestate samples were submitted to subsequent aerobic treatment except for samples 80 and 89, PW: presswater
- b) plant code: C: compost, K: organic kitchen waste and green waste as input materials, G: pure green waste compost, U: urban area of input material collection, R: rural area of input material collection
- c) kw: kitchen waste, gw: green waste, iw: industrial waste including paper sludge, coffee ground, tea leaves, residues from potato chips production, biodegradable plastics, edible oil, cacao
- d) characterisation of the area where the input material was collected
- e) season of input material collection
- f) plant type: ab: aerated boxes, atc: aerated trench composting in sheds, bwc: combined box and windrow composting, fec: field-edge composting, mcd: mesophilic aerobic co-digestion, tad: thermophilic aerobic digestion, tbw: table windrows, twh: triangle windrows higher than 2 meters, twl: triangle windrows lower than 2 meters, vc: vermicomposting
- g) contains small amounts of digested material in the compost input material
- h) duration of the treatment process in days
- i) NO<sub>3</sub><sup>-</sup> nd
- j) sieve-width in mm, not: unsieved
- k) NH<sub>4</sub><sup>+</sup> nd

NAP: naphthalene, ACY: acenaphthylene, ACE: acenaphthene, FLU: fluorene, PHE: phenanthrene, ANT: anthracene, FLT: fluoranthene, PYR: pyrene, BaA: benzo[*a*]anthracene, CHR: chrysene, BbF: benzo[*b*]fluoranthene, BkF: benzo[*k*]fluoranthene, BaP: benzo[*a*]pyrene, IPY: indeno[1,2,3-*cd*]pyrene, BPE: benzo[*ghi*]perylene, CPHE: 4-H-cyclopenta[*def*]PHE, RET: retene, CPYR: cyclopenta[*cd*]PYR, COR: coronene, (MPHE&ANT)/PHE: ratio of methylPHE and -ANT to PHE, (MFLT&PYR)/PYR: ratio of methylFLT and -PYR to PYR, 1,7-/(1,7-&2,6-)DmPHE: the ratio of 1,7- to 1,7- and 2,6-dimethylPHE, nd: not detected, na: not available, EF enantiomeric fraction, ww: wet weight, dw: dry weight



Supplementary Material (ESI) for Journal of Environmental Monitoring  
This journal is © The Royal Society of Chemistry 2007

Table S1 (cont.): Sample description, PCB, PAH, heavy metal and nutrient contents of compost, digestate and presswater samples in Switzerland

| Sample No.                                                             | 12            | 14              | 15               | 16     | 17     | 19     | 21     | 24     | 25     | 26     |
|------------------------------------------------------------------------|---------------|-----------------|------------------|--------|--------|--------|--------|--------|--------|--------|
| Product <sup>a</sup>                                                   | Com           | Com             | Com              | Com    | Com    | Dig    | Com    | Com    | Com    | Com    |
| Plant code and number <sup>b</sup>                                     | CKU05         | CGR02           | CKU03            | CKU04  | CGU04  | DKU02  | CGU6   | CGR03  | CGR08  | CGR04  |
| Input material <sup>c</sup>                                            | kw, gw,<br>iw | gw              | kw, gw           | kw, gw | gw     | kw, gw | gw     | gw     | gw     | gw     |
| Origin of input material <sup>d</sup>                                  | urban         | rural           | urban            | urban  | urban  | urban  | rural  | rural  | rural  | rural  |
| Season <sup>e</sup>                                                    | autumn        | winter          | summer           | autumn | autumn | winter | winter | winter | winter | autumn |
| Plant type <sup>f</sup>                                                | bwc           | twh             | atc <sup>g</sup> | twh    | tbw    | tad    | twh    | twh    | twl    | twh    |
| Process duration (days) <sup>h</sup>                                   | 136           | 83              | 63               | 210    | 127    | 105    | 87     | 87     | 74     | 203    |
| Water content [% ww]                                                   | 59            | 49              | 27               | 47     | 53     | 45     | 36     | 52     | 38     | 40     |
| Org matter content [% dw]                                              | 45            | 40              | 32               | 41     | 40     | 42     | 37     | 37     | 31     | 27     |
| Impurity content [% dw]                                                | 0.19          | 0.18            | 0.14             | 0.39   | 0.19   | na     | 0.27   | 0.2    | 0.15   | 0.074  |
| Maturity (NO <sub>3</sub> <sup>-</sup> /NH <sub>4</sub> <sup>+</sup> ) | 0.31          | nd <sup>i</sup> | 0.0079           | 2.5    | 1.1    | 35     | 0.16   | 1.1    | 4.9    | 0.59   |
| Particle size [mm] <sup>j</sup>                                        | <20           | <20             | <10              | <10    | <20    | <10    | <12    | <20    | <20    | <20    |
| <b>PCB (µg/kg<sub>dw</sub>)</b>                                        |               |                 |                  |        |        |        |        |        |        |        |
| PCB 28                                                                 | nd            | nd              | nd               | nd     | nd     | nd     | nd     | nd     | nd     | nd     |
| PCB 52                                                                 | 2.0           | 5.1             | 2.8              | 2.4    | 1.8    | 4.6    | 3.7    | 0.86   | 0.56   | 0.88   |
| PCB 95                                                                 | 2.8           | 3.1             | 4.3              | na     | na     | 7.3    | 4.7    | 1.3    | 1.0    | 1.3    |
| PCB 101                                                                | 3.8           | 3.9             | 6.2              | 6.3    | 5.2    | 9.9    | 6.0    | 1.8    | 1.4    | 1.9    |
| PCB 118                                                                | 3.1           | 3.1             | 13               | 6.0    | 4.6    | 8.7    | 5.0    | 1.4    | 0.98   | 1.5    |
| PCB 132                                                                | 2.7           | 2.1             | 3.1              | na     | na     | 6.3    | 3.9    | 1.2    | 1.2    | 1.0    |
| PCB 138                                                                | 3.5           | 4.4             | 8.0              | 8.3    | 6.1    | 8.6    | 6.6    | 2.1    | 2.3    | 2.0    |
| PCB 149                                                                | 3.5           | 3.5             | 4.8              | na     | na     | 8.6    | 5.2    | 1.9    | 1.7    | 1.8    |
| PCB 153                                                                | 5.3           | 5.4             | 7.7              | 6.3    | 5.1    | 13     | 7.6    | 2.9    | 2.6    | 2.9    |
| PCB 174                                                                | 1.3           | 1.2             | 1.3              | na     | na     | 2.1    | 1.3    | 0.62   | 0.56   | 0.48   |
| PCB 180                                                                | 3.0           | 2.8             | 3.6              | 2.7    | 2.1    | 6.9    | 3.8    | 1.7    | 1.7    | 1.5    |
| EF PCB 95                                                              | 0.50          | 0.50            | 0.50             | 0.50   | 0.50   | 0.50   | 0.51   | 0.50   | 0.50   | 0.49   |
| EF PCB 132                                                             | 0.49          | 0.5             | 0.49             | 0.50   | 0.50   | 0.49   | 0.49   | 0.50   | 0.51   | 0.50   |
| EF PCB 149                                                             | 0.50          | 0.50            | 0.50             | 0.48   | 0.49   | 0.50   | 0.50   | 0.50   | 0.49   | 0.50   |
| <b>PAH (µg/kg<sub>dw</sub>)</b>                                        |               |                 |                  |        |        |        |        |        |        |        |
| NAP                                                                    | 21            | 22              | 27               | 19     | 15     | 49     | 14     | 55     | 24     | 19     |
| ACY                                                                    | 3.2           | 3.9             | 5.1              | 3.0    | 2.4    | 6.0    | 2.5    | 6.3    | 14     | 2.4    |
| ACE                                                                    | 33            | 9.0             | 86               | 9.7    | 4.4    | 20     | 15     | 24     | 34     | 8.3    |
| FLU                                                                    | 50            | 11              | 78               | 22     | 9.3    | 28     | 32     | 60     | 33     | 13     |
| PHE                                                                    | 390           | 160             | 650              | 140    | 130    | 340    | 300    | 430    | 200    | 190    |
| ANT                                                                    | 29            | 28              | 110              | 21     | 16     | 44     | 25     | 33     | 45     | 22     |
| FLT                                                                    | 600           | 510             | 990              | 420    | 380    | 760    | 610    | 470    | 1000   | 470    |
| PYR                                                                    | 380           | 420             | 660              | 190    | 190    | 480    | 410    | 300    | 1100   | 240    |
| BaA                                                                    | 150           | 230             | 470              | 130    | 190    | 350    | 230    | 180    | 810    | 130    |
| CHR                                                                    | 240           | 270             | 470              | 220    | 390    | 540    | 360    | 330    | 1100   | 290    |
| BbF                                                                    | 150           | 270             | 530              | 180    | 410    | 480    | 250    | 300    | 540    | 220    |
| BkF                                                                    | 74            | 170             | 320              | 52     | 220    | 240    | 160    | 120    | 280    | 83     |
| BaP                                                                    | 77            | 220             | 420              | 110    | 190    | 250    | 130    | 150    | 260    | 88     |
| IPY                                                                    | 120           | 220             | 330              | 110    | 310    | 320    | 190    | 220    | 230    | 120    |
| BPE                                                                    | 120           | 210             | 300              | 130    | 270    | 290    | 170    | 190    | 180    | 120    |
| CPHE                                                                   | 23            | 18              | 54               | 18     | 11     | 16     | 17     | 23     | 18     | 5.5    |
| RET                                                                    | 130           | 67              | 76               | 81     | 150    | 100    | 200    | 51     | 37     | 41     |
| CPYR                                                                   | 14            | 9.0             | 4.1              | 5.4    | 7.6    | 6.4    | 7.3    | 6.4    | 11     | 1.8    |
| PER                                                                    | 32            | 69              | 120              | 44     | 60     | 92     | 45     | 42     | 75     | 28     |
| COR                                                                    | 77            | 90              | 110              | 40     | 110    | 130    | 76     | 120    | 57     | 58     |
| (MPHE/ANT)/PHE [-]                                                     | 0.38          | 0.66            | 0.59             | 0.79   | 0.48   | 0.39   | 0.58   | 0.32   | 0.76   | 0.37   |
| (MFLT/PYR)/PYR [-]                                                     | 0.30          | 0.32            | 0.49             | 0.57   | 0.48   | 0.39   | 0.38   | 0.39   | 0.42   | 0.34   |
| 1,7-/(1,7-&2,6-DmPHE) [-]                                              | 0.61          | 0.69            | 0.6              | 0.68   | 0.75   | 0.65   | 0.68   | 0.62   | 0.61   | 0.67   |
| <b>Heavy metals (mg/kg<sub>dw</sub>)</b>                               |               |                 |                  |        |        |        |        |        |        |        |
| Cd                                                                     | 0.032         | 0.20            | 0.21             | 0.22   | 0.16   | 0.18   | 0.064  | 0.18   | 0.29   | 0.15   |
| Co                                                                     | 3.5           | 4.6             | 5.5              | 4.9    | 4.3    | 3.6    | 4.6    | 4.2    | 4.4    | 5.0    |
| Cr                                                                     | 21            | 16              | 29               | 25     | 18     | 25     | 18     | 18     | 23     | 22     |
| Cu                                                                     | 49            | 34              | 72               | 91     | 58     | 160    | 53     | 57     | 50     | 58     |
| Ni                                                                     | 15            | 17              | 27               | 22     | 16     | 17     | 15     | 14     | 16     | 17     |
| Pb                                                                     | 27            | 71              | 70               | 49     | 36     | 48     | 37     | 51     | 35     | 32     |
| Zn                                                                     | 140           | 170             | 180              | 170    | 150    | 210    | 210    | 170    | 120    | 130    |

---

**Nutrients (g/kg<sub>dw</sub>)**

|    |     |     |     |     |     |     |     |     |     |     |
|----|-----|-----|-----|-----|-----|-----|-----|-----|-----|-----|
| N  | 18  | 9.5 | 16  | 17  | 16  | 19  | 16  | 14  | 12  | 12  |
| P  | 3.5 | 1.7 | 3.4 | 2.9 | 2.7 | 3.6 | 3.2 | 2.8 | 2.2 | 3.0 |
| K  | 12  | 5.1 | 9.9 | 11  | 11  | 13  | 13  | 11  | 6.7 | 12  |
| Mg | 6.6 | 6.4 | 4.7 | 5.6 | 6.2 | 9.4 | 5.8 | 10  | 6.3 | 11  |
| Ca | 59  | 60  | 51  | 65  | 66  | 59  | 69  | 70  | 46  | 76  |

**Further elements (g/kg<sub>dw</sub>)**

|    |      |      |      |      |      |      |      |      |      |      |
|----|------|------|------|------|------|------|------|------|------|------|
| Fe | 9.2  | 11   | 16   | 11   | 9.1  | 10   | 12   | 9.1  | 11.0 | 11   |
| Mn | 0.41 | 0.48 | 0.43 | 0.40 | 0.46 | 0.50 | 0.45 | 0.45 | 0.55 | 0.93 |
| Na | 1.6  | 0.31 | 0.61 | 1.0  | 0.62 | 1.40 | 0.70 | 0.63 | 0.48 | 0.46 |

---

**Ancillary data**

|                      |      |      |      |      |      |      |      |      |      |      |
|----------------------|------|------|------|------|------|------|------|------|------|------|
| pH                   | 8.1  | 8.5  | 8.3  | 8.3  | 8.4  | 8.4  | 8.4  | 8.5  | 8.4  | 8.4  |
| Conductivity (μS/cm) | 2900 | 1300 | 2800 | 2900 | 2700 | 3700 | 3600 | 2200 | 1900 | 3700 |

- a) Com: compost, Dig: digestate, all digestate samples were submitted to subsequent aerobic treatment except for samples 80 and 89, PW: presswater  
b) plant code: C: compost, K: organic kitchen waste and green waste as input materials, G: pure green waste compost, U: urban area of input material collection, R: rural area of input material collection  
c) kw: kitchen waste, gw: green waste, iw: industrial waste including paper sludge, coffee ground, tea leaves, residues from potato chips production, biodegradable plastics, edible oil, cacao  
d) characterisation of the area where the input material was collected  
e) season of input material collection  
f) plant type: ab: aerated boxes, atc: aerated trench composting in sheds, bwc: combined box and windrow composting, fec: field-edge composting, mcd: mesophilic aerobic co-digestion, tad: thermophilic aerobic digestion, tbw: table windrows, twh: triangle windrows higher than 2 meters, twl: triangle windrows lower than 2 meters, vc: vermicomposting  
g) contains small amounts of digested material in the compost input material  
h) duration of the treatment process in days  
i) NO<sub>3</sub><sup>-</sup> nd  
j) sieve-width in mm, not: unsieved  
k) NH<sub>4</sub><sup>+</sup> nd

NAP: naphthalene, ACY: acenaphthylene, ACE: acenaphthene, FLU: fluorene, PHE: phenanthrene, ANT: anthracene, FLT: fluoranthene, PYR: pyrene, BaA: benzo[*a*]anthracene, CHR: chrysene, BbF: benzo[*b*]fluoranthene, BkF: benzo[*k*]fluoranthene, BaP: benzo[*a*]pyrene, IPY: indeno[1,2,3-*cd*]pyrene, BPE: benzo[*ghi*]perylene, CPHE: 4-H-cyclopenta[*def*]PHE, RET: retene, CPYR: cyclopenta[*cd*]PYR, COR: coronene, (MPHE&ANT)/PHE: ratio of methylPHE and -ANT to PHE, (MFLT&PYR)/PYR: ratio of methylFLT and -PYR to PYR, 1,7-/(1,7-&2,6-)DmPHE: the ratio of 1,7- to 1,7- and 2,6-dimethylPHE, nd: not detected, na: not available, EF enantiomeric fraction, ww: wet weight, dw: dry weight

Supplementary Material (ESI) for Journal of Environmental Monitoring  
This journal is © The Royal Society of Chemistry 2007

Table S1 (cont.): Sample description, PCB, PAH, heavy metal and nutrient contents of compost, digestate and presswater samples in Switzerland

| Sample No.                                                             | 28     | 29              | 30     | 33               | 34     | 35              | 36               | 37               | 38              | 39     |
|------------------------------------------------------------------------|--------|-----------------|--------|------------------|--------|-----------------|------------------|------------------|-----------------|--------|
| Product <sup>a</sup>                                                   | Com    | Com             | Com    | Com              | Com    | Com             | Com              | Com              | Com             | Com    |
| Plant code and number <sup>b</sup>                                     | CKU02  | CKU01           | CGR01  | CKU03            | CKU04  | CGU04           | CKU07            | CKU07            | CGU05           | CGU08  |
| Input material <sup>c</sup>                                            | kw, gw | kw, gw,<br>iw   | gw     | kw, gw           | kw, gw | gw              | kw, gw           | kw, gw           | gw              | gw     |
| Origin of input material <sup>d</sup>                                  | urban  | urban           | rural  | urban            | urban  | urban           | urban            | urban            | urban           | urban  |
| Season <sup>e</sup>                                                    | summer | summer          | summer | summer           | summer | summer          | summer           | summer           | summer          | autumn |
| Plant type <sup>f</sup>                                                | ab     | twl             | twl    | atc <sup>g</sup> | tbw    | twh             | twl <sup>g</sup> | twl <sup>g</sup> | atc             | twh    |
| Process duration (days) <sup>h</sup>                                   | 55     | 50              | 70     | 35               | 91     | 96              | 87               | 107              | 33              | 298    |
| Water content [% ww]                                                   | 45     | 49              | 35     | 39               | 37     | 43              | 43               | 50               | 43              | 45     |
| Org matter content [% dw]                                              | 51     | 51              | 27     | 34               | 36     | 45              | 41               | 53               | 44              | 24     |
| Impurity content [% dw]                                                | 0.078  | 0.017           | 0.15   | 0.13             | 2.5    | 0.26            | 0.22             | 0.047            | 0.21            | 0.17   |
| Maturity (NO <sub>3</sub> <sup>-</sup> /NH <sub>4</sub> <sup>+</sup> ) | 0.38   | nd <sup>i</sup> | 2.0    | 0.032            | 0.48   | nd <sup>i</sup> | 46               | nd <sup>i</sup>  | nd <sup>i</sup> | 25     |
| Particle size [mm] <sup>j</sup>                                        | <20    | <40             | <25    | <10              | not    | <40             | <10              | <40              | <20             | <20    |
| <b>PCB (µg/kg<sub>dw</sub>)</b>                                        |        |                 |        |                  |        |                 |                  |                  |                 |        |
| PCB 28                                                                 | nd     | nd              | nd     | nd               | nd     | nd              | nd               | nd               | nd              | nd     |
| PCB 52                                                                 | 1.5    | 2.0             | 5.1    | 3.0              | 1.8    | 2.0             | 2.9              | 2.7              | 4.7             | 0.73   |
| PCB 95                                                                 | 2.6    | 3.1             | 13     | 3.9              | 2.3    | 2.9             | 4.4              | 3.4              | 4.7             | 2.1    |
| PCB 101                                                                | 3.4    | 3.8             | 15     | 5.3              | 3.2    | 4.0             | 5.9              | 4.6              | 6.0             | 2.3    |
| PCB 118                                                                | 2.4    | 2.9             | 6.0    | 9.5              | 2.8    | 4.0             | 5.2              | 3.9              | 8.3             | 1.8    |
| PCB 132                                                                | 2.4    | 2.4             | 15     | 3.4              | 2.0    | 2.6             | 3.8              | 2.3              | 2.4             | 1.8    |
| PCB 138                                                                | 5.2    | 4.6             | 17     | 3.8              | 4.2    | 3.7             | 7.2              | 3.3              | 6.4             | 3.9    |
| PCB 149                                                                | 3.8    | 3.5             | 22     | 4.8              | 2.6    | 3.4             | 4.8              | 4.1              | 4.5             | 2.9    |
| PCB 153                                                                | 5.8    | 4.9             | 31     | 7.4              | 4.2    | 5.8             | 7.2              | 6.6              | 6.6             | 4.3    |
| PCB 174                                                                | 1.0    | 1.1             | 6.0    | 1.7              | 0.76   | 1.2             | 1.2              | 1.5              | 1.6             | 0.86   |
| PCB 180                                                                | 3.8    | 2.8             | 20     | 4.9              | 2.2    | 2.9             | 3.8              | 2.9              | 3.2             | 2.3    |
| EF PCB 95                                                              | 0.50   | 0.50            | 0.50   | 0.48             | 0.50   | 0.50            | 0.50             | 0.50             | 0.50            | 0.50   |
| EF PCB 132                                                             | 0.46   | 0.48            | 0.50   | 0.51             | 0.50   | 0.48            | 0.49             | 0.50             | 0.50            | 0.49   |
| EF PCB 149                                                             | 0.50   | 0.50            | 0.50   | 0.50             | 0.50   | 0.50            | 0.50             | 0.50             | 0.50            | 0.50   |
| <b>PAH (µg/kg<sub>dw</sub>)</b>                                        |        |                 |        |                  |        |                 |                  |                  |                 |        |
| NAP                                                                    | 36     | 17              | 28     | 23               | 9.1    | 15              | 20               | 38               | 16              | 27     |
| ACY                                                                    | 28     | 3.2             | 3.6    | 2.5              | 1.7    | 2.2             | 4.3              | 2.9              | 3.7             | 4.5    |
| ACE                                                                    | 23     | 120             | 8.6    | 9.0              | 4.6    | 32              | 8.5              | 120              | 120             | 2.1    |
| FLU                                                                    | 73     | 35              | 15     | 21               | 4.5    | 40              | 17               | 210              | 140             | 4.6    |
| PHE                                                                    | 1100   | 350             | 160    | 300              | 220    | 420             | 170              | 870              | 810             | 59     |
| ANT                                                                    | 210    | 26              | 24     | 28               | 13     | 25              | 35               | 51               | 77              | 11     |
| FLT                                                                    | 2000   | 600             | 500    | 550              | 400    | 650             | 520              | 910              | 760             | 210    |
| PYR                                                                    | 1500   | 460             | 250    | 300              | 280    | 490             | 310              | 660              | 560             | 180    |
| BaA                                                                    | 770    | 130             | 270    | 260              | 180    | 250             | 240              | 290              | 240             | 170    |
| CHR                                                                    | 810    | 190             | 430    | 300              | 250    | 340             | 440              | 370              | 310             | 200    |
| BbF                                                                    | 890    | 150             | 500    | 320              | 220    | 320             | 390              | 310              | 220             | 230    |
| BkF                                                                    | 480    | 71              | 230    | 170              | 100    | 160             | 170              | 160              | 110             | 110    |
| BaP                                                                    | 620    | 84              | 260    | 210              | 98     | 200             | 170              | 220              | 160             | 200    |
| IPY                                                                    | 960    | 99              | 320    | 320              | 110    | 230             | 250              | 210              | 150             | 190    |
| BPE                                                                    | 540    | 93              | 290    | 200              | 110    | 200             | 220              | 200              | 170             | 240    |
| CPHE                                                                   | 88     | 37              | 6.6    | 20               | 2.7    | 27              | 8.9              | 66               | 46              | 12     |
| RET                                                                    | 68     | 94              | 85     | 66               | 93     | 200             | 210              | 170              | 58              | 18     |
| CPYR                                                                   | 31     | 1.5             | 2.6    | 4.7              | 1.3    | 2.2             | 1.9              | 3.0              | 8.1             | 12     |
| PER                                                                    | 180    | 27              | 87     | 60               | 34     | 63              | 56               | 68               | 51              | 64     |
| COR                                                                    | 190    | 39              | 120    | 78               | 40     | 77              | 87               | 70               | 71              | 140    |
| (MPHE/ANT)/PHE [-]                                                     | 0.36   | 0.44            | 0.44   | 0.52             | 0.48   | 0.38            | 0.73             | 0.31             | 0.27            | 0.62   |
| (MFLT/PYR)/PYR [-]                                                     | 0.30   | 0.25            | 0.51   | 0.47             | 0.33   | 0.33            | 0.49             | 0.37             | 0.30            | 0.50   |
| 1,7-(1,7-&2,6-DmPHE) [-]                                               | 0.58   | 0.63            | 0.66   | 0.62             | 0.65   | 0.68            | 0.69             | 0.63             | 0.59            | 0.57   |
| <b>Heavy metals (mg/kg<sub>dw</sub>)</b>                               |        |                 |        |                  |        |                 |                  |                  |                 |        |
| Cd                                                                     | 0.25   | nd              | 0.099  | 0.13             | nd     | nd              | nd               | nd               | nd              | 0.032  |
| Co                                                                     | 4.4    | 3.4             | 4.3    | 5.3              | 4.9    | 3.9             | 3.9              | 3.6              | 3.4             | 5.4    |
| Cr                                                                     | 16     | 15              | 20     | 28               | 25     | 15              | 20               | 14               | 19              | 13     |
| Cu                                                                     | 58     | 44              | 59     | 110              | 64     | 48              | 59               | 47               | 36              | 47     |
| Ni                                                                     | 14     | 13              | 17     | 27               | 24     | 15              | 18               | 15               | 14              | 16     |
| Pb                                                                     | 61     | 29              | 59     | 65               | 38     | 39              | 32               | 45               | 32              | 46     |
| Zn                                                                     | 190    | 110             | 140    | 190              | 140    | 130             | 150              | 110              | 140             | 160    |

| <b>Nutrients (g/kg<sub>dw</sub>)</b>        |      |      |      |      |      |      |      |      |      |      |
|---------------------------------------------|------|------|------|------|------|------|------|------|------|------|
| N                                           | 26   | 19   | 11   | 16   | 17   | 17   | 19   | 18   | 20   | 9.6  |
| P                                           | 4.3  | 2.9  | 2.2  | 3.9  | 3.0  | 3.0  | 3.0  | 2.7  | 3.6  | 1.3  |
| K                                           | 25   | 16   | 7.6  | 7.4  | 14   | 15   | 13   | 14   | 15   | 2.2  |
| Mg                                          | 5.1  | 4.1  | 7.1  | 4.7  | 5.0  | 5.0  | 7.7  | 5.9  | 4.5  | 9.5  |
| Ca                                          | 70   | 53   | 58   | 53   | 53   | 46   | 75   | 58   | 31   | 41   |
| <b>Further elements (g/kg<sub>dw</sub>)</b> |      |      |      |      |      |      |      |      |      |      |
| Fe                                          | 9.7  | 7.2  | 10   | 15   | 10   | 8.9  | 9.7  | 8.3  | 8.9  | 14   |
| Mn                                          | 0.42 | 0.34 | 0.67 | 0.43 | 0.40 | 0.38 | 0.38 | 0.31 | 0.41 | 0.32 |
| Na                                          | 0.81 | 0.71 | 0.49 | 0.54 | 0.75 | 0.65 | 0.66 | 0.61 | 0.75 | 0.18 |
| <b>Ancillary data</b>                       |      |      |      |      |      |      |      |      |      |      |
| pH                                          | 8.5  | 8.5  | 8.3  | 8.3  | 8.1  | 8.2  | 7.8  | 8.2  | 8.3  | 8.0  |
| Conductivity (μS/cm)                        | 4500 | 3200 | 1800 | 2200 | 4400 | 5300 | 4100 | 4400 | 4300 | 680  |

- a) Com: compost, Dig: digestate, all digestate samples were submitted to subsequent aerobic treatment except for samples 80 and 89, PW: presswater
- b) plant code: C: compost, K: organic kitchen waste and green waste as input materials, G: pure green waste compost, U: urban area of input material collection, R: rural area of input material collection
- c) kw: kitchen waste, gw: green waste, iw: industrial waste including paper sludge, coffee ground, tea leaves, residues from potato chips production, biodegradable plastics, edible oil, cacao
- d) characterisation of the area where the input material was collected
- e) season of input material collection
- f) plant type: ab: aerated boxes, atc: aerated trench composting in sheds, bwc: combined box and windrow composting, fec: field-edge composting, mcd: mesophilic aerobic co-digestion, tad: thermophilic aerobic digestion, tbw: table windrows, twh: triangle windrows higher than 2 meters, twl: triangle windrows lower than 2 meters, vc: vermicomposting
- g) contains small amounts of digested material in the compost input material
- h) duration of the treatment process in days
- i) NO<sub>3</sub><sup>-</sup> nd
- j) sieve-width in mm, not: unsieved
- k) NH<sub>4</sub><sup>+</sup> nd

NAP: naphthalene, ACY: acenaphthylene, ACE: acenaphthene, FLU: fluorene, PHE: phenanthrene, ANT: anthracene, FLT: fluoranthene, PYR: pyrene, BaA: benzo[*a*]anthracene, CHR: chrysene, BbF: benzo[*b*]fluoranthene, BkF: benzo[*k*]fluoranthene, BaP: benzo[*a*]pyrene, IPY: indeno[1,2,3-*cd*]pyrene, BPE: benzo[*ghi*]perylene, CPHE: 4-H-cyclopenta[*def*]PHE, RET: retene, CPYR: cyclopenta[*cd*]PYR, COR: coronene, (MPHE&ANT)/PHE: ratio of methylPHE and -ANT to PHE, (MFLT&PYR)/PYR: ratio of methylFLT and -PYR to PYR, 1,7-/(1,7-&2,6-)DmPHE: the ratio of 1,7- to 1,7- and 2,6-dimethylPHE, nd: not detected, na: not available, EF enantiomeric fraction, ww: wet weight, dw: dry weight

Supplementary Material (ESI) for Journal of Environmental Monitoring  
This journal is © The Royal Society of Chemistry 2007

Table S1 (cont.): Sample description, PCB, PAH, heavy metal and nutrient contents of compost, digestate and presswater samples in Switzerland

| Sample No.                                                             | 40     | 41     | 42            | 43     | 44               | 45     | 48     | 49              | 50              | 51              |
|------------------------------------------------------------------------|--------|--------|---------------|--------|------------------|--------|--------|-----------------|-----------------|-----------------|
| Product <sup>a</sup>                                                   | Com    | Com    | Dig           | Com    | Dig              | Com    | Com    | Dig             | Com             | Com             |
| Plant code and number <sup>b</sup>                                     | CGU07  | CGR02  | DKU05         | CKU08  | DKU06            | CGU01  | CGU02  | DKU01           | CGU03           | CGR04           |
| Input material <sup>c</sup>                                            | gw     | gw     | kw, gw,<br>iw | kw, gw | kw, gw,<br>iw    | gw, iw | gw, iw | kw, gw,<br>iw   | gw              | gw              |
| Origin of input material <sup>d</sup>                                  | urban  | rural  | urban         | urban  | urban            | urban  | rural  | urban           | urban           | rural           |
| Season <sup>e</sup>                                                    | autumn | summer | summer        | summer | summer           | summer | summer | summer          | summer          | summer          |
| Plant type <sup>f</sup>                                                | twh    | twh    | tad           | twl    | twl <sup>g</sup> | twl    | twh    | tad             | twh             | twh             |
| Process duration (days) <sup>h</sup>                                   | 168    | 70     | 91            | 70     | 28               | 70     | 105    | 20              | 49              | 105             |
| Water content [% ww]                                                   | 59     | 51     | 43            | 43     | 52               | 39     | 34     | 44              | 52              | 32              |
| Org matter content [% dw]                                              | 42     | 33     | 34            | 23     | 43               | 31     | 44     | 51              | 51              | 39              |
| Impurity content [% dw]                                                | 0.12   | 0.064  | 1.4           | 0.10   | 0.33             | 0.081  | 0.044  | 0.40            | 0.28            | 0.11            |
| Maturity (NO <sub>3</sub> <sup>-</sup> /NH <sub>4</sub> <sup>+</sup> ) | 33     | 0.4    | 0.41          | 30     | 0.083            | 0.28   | 0.14   | nd <sup>i</sup> | nd <sup>i</sup> | nd <sup>i</sup> |
| Particle size [mm] <sup>j</sup>                                        | <20    | <20    | <40           | <15    | <40              | not    | <10    | <40             | <40             | not             |
| <b>PCB (µg/kg<sub>dw</sub>)</b>                                        |        |        |               |        |                  |        |        |                 |                 |                 |
| PCB 28                                                                 | nd     | nd     | nd            | nd     | nd               | nd     | 21     | nd              | nd              | nd              |
| PCB 52                                                                 | 1.9    | 3.5    | 4.0           | 1.3    | 2.1              | 1.5    | 25     | 1.5             | 3.8             | 0.88            |
| PCB 95                                                                 | 3.7    | 2.6    | 4.4           | 2.3    | 2.8              | 4.1    | 9.4    | 2.9             | 4.8             | 1.4             |
| PCB 101                                                                | 4.8    | 3.4    | 5.8           | 2.9    | 3.7              | 5.3    | 10     | 4.4             | 6.6             | 1.8             |
| PCB 118                                                                | 3.7    | 2.4    | 4.1           | 3.5    | 2.8              | 2.4    | 15     | 4.1             | 5.3             | 1.6             |
| PCB 132                                                                | 3.1    | 1.6    | 2.9           | 1.9    | 1.8              | 4.1    | 5.4    | 2.7             | 3.2             | 0.60            |
| PCB 138                                                                | 5.2    | 3.4    | 6.1           | 3.5    | 4.0              | 8.3    | 9.4    | 6.1             | 7.2             | 1.8             |
| PCB 149                                                                | 4.8    | 2.9    | 5.5           | 3.4    | 3.2              | 7.4    | 9.4    | 3.9             | 6.5             | 1.8             |
| PCB 153                                                                | 7.2    | 4.5    | 8.4           | 5.2    | 4.6              | 10     | 13     | 6.7             | 9.5             | 3.9             |
| PCB 174                                                                | 1.5    | 0.96   | 1.6           | 1.0    | 0.99             | 2.3    | 2.5    | 1.3             | 2.2             | 0.50            |
| PCB 180                                                                | 5.0    | 2.7    | 4.8           | 2.9    | 2.7              | 6.7    | 8.0    | 2.7             | 5.8             | 1.5             |
| EF PCB 95                                                              | 0.50   | 0.49   | 0.50          | 0.50   | 0.50             | 0.50   | 0.50   | 0.50            | 0.50            | 0.50            |
| EF PCB 132                                                             | 0.51   | 0.50   | 0.50          | 0.50   | 0.51             | 0.50   | 0.50   | 0.50            | 0.49            | 0.50            |
| EF PCB 149                                                             | 0.49   | 0.50   | 0.50          | 0.50   | 0.49             | 0.50   | 0.51   | 0.49            | 0.50            | 0.49            |
| <b>PAH (µg/kg<sub>dw</sub>)</b>                                        |        |        |               |        |                  |        |        |                 |                 |                 |
| NAP                                                                    | 14     | 22     | 11            | 25     | 22               | 18     | 22     | 65              | 13              | 13              |
| ACY                                                                    | 1.2    | 4.3    | 1.8           | 3.0    | 3.1              | 2.8    | 3.5    | 8.9             | 1.8             | 4.1             |
| ACE                                                                    | 1.8    | 14     | 4.1           | 8.8    | 56               | 11     | 5.5    | 220             | 18              | 110             |
| FLU                                                                    | 3.1    | 26     | 4.2           | 25     | 64               | 15     | 9.0    | 210             | 15              | 110             |
| PHE                                                                    | 38     | 220    | 73            | 140    | 410              | 240    | 77     | 1300            | 230             | 800             |
| ANT                                                                    | 2.5    | 23     | 14            | 17     | 41               | 22     | 11     | 180             | 24              | 66              |
| FLT                                                                    | 120    | 520    | 450           | 240    | 760              | 650    | 310    | 1100            | 660             | 770             |
| PYR                                                                    | 52     | 260    | 410           | 110    | 490              | 420    | 410    | 800             | 500             | 540             |
| BaA                                                                    | 30     | 170    | 170           | 110    | 200              | 150    | 190    | 240             | 250             | 160             |
| CHR                                                                    | 80     | 280    | 290           | 170    | 300              | 240    | 300    | 340             | 340             | 270             |
| BbF                                                                    | 73     | 260    | 290           | 160    | 240              | 220    | 380    | 290             | 330             | 230             |
| BkF                                                                    | 27     | 110    | 140           | 61     | 120              | 110    | 190    | 150             | 190             | 120             |
| BaP                                                                    | 36     | 150    | 110           | 93     | 130              | 120    | 190    | 200             | 200             | 120             |
| IPY                                                                    | 57     | 180    | 220           | 110    | 200              | 200    | 400    | 210             | 270             | 160             |
| BPE                                                                    | 67     | 170    | 140           | 110    | 130              | 130    | 250    | 160             | 200             | 120             |
| CPHE                                                                   | 7.3    | 11     | 5.0           | 8.3    | 38               | 11     | 7.4    | 68              | 19              | 46              |
| RET                                                                    | 43     | 66     | 110           | 18     | 56               | 54     | 320    | 68              | 67              | 120             |
| CPYR                                                                   | 9.3    | 3.7    | 1.7           | 8.6    | 5.0              | 2.6    | 4.2    | 6.3             | 8.6             | 2.7             |
| PER                                                                    | 23     | 58     | 37            | 34     | 37               | 30     | 51     | 55              | 59              | 33              |
| COR                                                                    | 43     | 79     | 54            | 63     | 52               | 65     | 130    | 54              | 81              | 51              |
| (MPHE/ANT)/PHE [-]                                                     | 0.33   | 0.42   | 1.1           | 0.22   | 0.36             | 0.57   | 3.1    | 0.30            | 0.53            | 0.33            |
| (MFLT/PYR)/PYR [-]                                                     | 0.32   | 0.41   | 0.28          | 0.51   | 0.29             | 0.25   | 0.36   | 0.29            | 0.28            | 0.28            |
| 1,7-(1,7-&2,6-DmPHE) [-]                                               | 0.76   | 0.64   | 0.65          | 0.68   | 0.62             | 0.62   | 0.67   | 0.57            | 0.64            | 0.61            |
| <b>Heavy metals (mg/kg<sub>dw</sub>)</b>                               |        |        |               |        |                  |        |        |                 |                 |                 |
| Cd                                                                     | 0.45   | 0.17   | 0.022         | 0.11   | 0.013            | 0.21   | 0.16   | 0.01            | 0.025           | 0.015           |
| Co                                                                     | 6.2    | 5.4    | 5.1           | 5.9    | 2.9              | 5.4    | 3.2    | 5.3             | 3.8             | 4.1             |
| Cr                                                                     | 41     | 21     | 24            | 24     | 13               | 20     | 17     | 31              | 16              | 18              |
| Cu                                                                     | 68     | 48     | 69            | 36     | 35               | 55     | 110    | 31              | 49              | 55              |
| Ni                                                                     | 22     | 18     | 20            | 22     | 9.7              | 18     | 10     | 9.2             | 14              | 14              |
| Pb                                                                     | 58     | 53     | 40            | 38     | 25               | 34     | 45     | 17              | 53              | 27              |
| Zn                                                                     | 210    | 120    | 120           | 110    | 90               | 140    | 120    | 79              | 160             | 140             |

| <b>Nutrients (g/kg<sub>dw</sub>)</b>        |      |      |      |      |      |      |      |      |      |      |
|---------------------------------------------|------|------|------|------|------|------|------|------|------|------|
| N                                           | 21   | 13   | 13   | 10   | 14   | 15   | 12   | 15   | 19   | 15   |
| P                                           | 3.3  | 2.5  | 3.6  | 2.1  | 2.8  | 3.9  | 1.7  | 3.3  | 3.1  | 3.1  |
| K                                           | 7.1  | 8.1  | 11   | 6.6  | 12   | 11   | 6.9  | 12   | 16   | 16   |
| Mg                                          | 7.0  | 6.4  | 9.5  | 13   | 8.9  | 4.4  | 4.4  | 7.3  | 7.3  | 9.0  |
| Ca                                          | 30   | 53   | 66   | 62   | 84   | 39   | 44   | 58   | 52   | 63   |
| <b>Further elements (g/kg<sub>dw</sub>)</b> |      |      |      |      |      |      |      |      |      |      |
| Fe                                          | 16   | 12   | 11   | 13   | 6.9  | 13.0 | 5.4  | 7.2  | 8.8  | 9.2  |
| Mn                                          | 0.49 | 0.56 | 0.58 | 0.71 | 0.38 | 0.61 | 0.24 | 0.35 | 0.37 | 0.57 |
| Na                                          | 0.29 | 0.43 | 1.0  | 0.44 | 0.95 | 0.55 | 0.65 | 1.4  | 0.50 | 0.47 |
| <b>Ancillary data</b>                       |      |      |      |      |      |      |      |      |      |      |
| pH                                          | 8.2  | 8.4  | 8.0  | 8.4  | 8.5  | 8.3  | 8.2  | 8.6  | 8.5  | 8.5  |
| Conductivity (µS/cm)                        | 1400 | 2100 | 4000 | 2000 | 3700 | 3900 | 1800 | 3000 | 3400 | 4200 |

a) Com: compost, Dig: digestate, all digestate samples were submitted to subsequent aerobic treatment except for samples 80 and 89, PW: presswater

b) plant code: C: compost, K: organic kitchen waste and green waste as input materials, G: pure green waste compost, U: urban area of input material collection, R: rural area of input material collection

c) kw: kitchen waste, gw: green waste, iw: industrial waste including paper sludge, coffee ground, tea leaves, residues from potato chips production, biodegradable plastics, edible oil, cacao

d) characterisation of the area where the input material was collected

e) season of input material collection

f) plant type: ab: aerated boxes, atc: aerated trench composting in sheds, bwc: combined box and windrow composting, fec: field-edge composting, mcd: mesophilic aerobic co-digestion, tad: thermophilic aerobic digestion, tbw: table windrows, twh: triangle windrows higher than 2 meters, twl: triangle windrows lower than 2 meters, vc: vermicomposting

g) contains small amounts of digested material in the compost input material

h) duration of the treatment process in days

i) NO<sub>3</sub><sup>-</sup> nd

j) sieve-width in mm, not: unsieved

k) NH<sub>4</sub><sup>+</sup> nd

NAP: naphthalene, ACY: acenaphthylene, ACE: acenaphthene, FLU: fluorene, PHE: phenanthrene, ANT: anthracene, FLT: fluoranthene, PYR: pyrene, BaA: benzo[a]anthracene, CHR: chrysene, BbF: benzo[b]fluoranthene, BkF: benzo[k]fluoranthene, BaP: benzo[a]pyrene, IPY: indeno[1,2,3-cd]pyrene, BPE: benzo[ghi]perylene, CPHE: 4-H-cyclopenta[def]PHE, RET: retene, CPYR: cyclopenta[cd]PYR, COR: coronene, (MPHE&ANT)/PHE: ratio of methylPHE and -ANT to PHE, (MFLT&PYR)/PYR: ratio of methylFLT and -PYR to PYR, 1,7-/(1,7-&2,6-)DmPHE: the ratio of 1,7- to 1,7- and 2,6-dimethylPHE, nd: not detected, na: not available, EF enantiomeric fraction, ww: wet weight, dw: dry weight

Supplementary Material (ESI) for Journal of Environmental Monitoring  
This journal is © The Royal Society of Chemistry 2007

Table S1 (cont.): Sample description, PCB, PAH, heavy metal and nutrient contents of compost, digestate and presswater samples in Switzerland

| Sample No.                                                             | 52              | 53     | 54     | 55     | 56 <sup>k</sup>  | 57              | 58            | 59            | 60     | 61     |
|------------------------------------------------------------------------|-----------------|--------|--------|--------|------------------|-----------------|---------------|---------------|--------|--------|
| Product <sup>a</sup>                                                   | Com             | Com    | Com    | Dig    | Com              | Dig             | Dig           | Dig           | Dig    | Com    |
| Plant code and number <sup>b</sup>                                     | CKU09           | CGR08  | CGR03  | DKU02  | CKU06            | DKU01           | DKU03         | DKU04         | DKU02  | CKU03  |
| Input material <sup>c</sup>                                            | kw, gw          | gw     | kw, gw | kw, gw | kw, gw           | kw, gw,<br>iw   | kw, gw,<br>iw | kw, gw,<br>iw | kw, gw | kw, gw |
| Origin of input material <sup>d</sup>                                  | urban           | rural  | rural  | urban  | urban            | urban           | urban         | urban         | urban  | urban  |
| Season <sup>e</sup>                                                    | summer          | summer | summer | summer | summer           | autumn          | autumn        | autumn        | autumn | autumn |
| Plant type <sup>f</sup>                                                | ab              | twl    | twg    | tab    | tbw <sup>g</sup> | tad             | tad           | tad           | tad    | atc    |
| Process duration (days) <sup>h</sup>                                   | 43              | 113    | 134    | 126    | 174              | 19              | 29            | 7             | 49     | 43     |
| Water content [% ww]                                                   | 45              | 47     | 49     | 34     | 37               | 47              | 31            | 55            | 41     | 52     |
| Org matter content [% dw]                                              | 43              | 30     | 35     | 47     | 26               | 50              | 34            | 51            | 49     | 46     |
| Impurity content [% dw]                                                | 0.082           | 0.061  | 0.13   | 2.3    | 0.086            | 0.35            | 0.062         | 0.32          | 0.038  | 0.29   |
| Maturity (NO <sub>3</sub> <sup>-</sup> /NH <sub>4</sub> <sup>+</sup> ) | nd <sup>i</sup> | 68     | 0.43   | 0.22   | 11               | nd <sup>i</sup> | 0.72          | 0.016         | 0.22   | 0.076  |
| Particle size [mm] <sup>j</sup>                                        | <10             | <10    | <20    | not    | <10              | <20             | <10           | <20           | not    | <10    |
| <b>PCB (µg/kg<sub>dw</sub>)</b>                                        |                 |        |        |        |                  |                 |               |               |        |        |
| PCB 28                                                                 | 1.8             | nd     | nd     | nd     | nd               | nd              | nd            | nd            | nd     | nd     |
| PCB 52                                                                 | 4.9             | 0.58   | 0.78   | 3.3    | 6.2              | 3.5             | 3.6           | 3.1           | 2.9    | 2.8    |
| PCB 95                                                                 | 3.7             | 1.1    | 1.4    | 5      | 31               | 5.1             | 4.8           | 3.6           | 4.8    | 4.1    |
| PCB 101                                                                | 4.9             | 1.3    | 2.0    | 6.8    | 73               | 6.6             | 6.1           | 4.9           | 6.3    | 5.5    |
| PCB 118                                                                | 3.2             | 1.1    | 1.7    | 5.9    | 130              | 5.0             | 4.9           | 3.4           | 5.1    | 4.8    |
| PCB 132                                                                | 2.8             | 0.78   | 1.2    | 4.0    | 69               | 4.9             | 4.2           | 2.9           | 3.9    | 3.1    |
| PCB 138                                                                | 5.6             | 1.9    | 2.9    | 8.6    | 130              | 7.9             | 6.9           | 5.2           | 7.1    | 5.6    |
| PCB 149                                                                | 5.5             | 1.6    | 2.2    | 6.2    | 78               | 7.0             | 6.5           | 4.3           | 6.1    | 4.7    |
| PCB 153                                                                | 8.0             | 2.5    | 3.6    | 9.5    | 140              | 9.8             | 9.4           | 6.3           | 8.9    | 6.9    |
| PCB 174                                                                | 1.5             | 0.5    | 0.74   | 1.6    | 17               | 2.4             | 2.3           | 1.5           | 2.1    | 1.6    |
| PCB 180                                                                | 5.0             | 1.4    | 2.2    | 5.1    | 57               | 6.0             | 6.1           | 2.9           | 5.0    | 4.2    |
| EF PCB 95                                                              | 0.50            | 0.49   | 0.50   | 0.50   | 0.50             | 0.51            | 0.50          | 0.51          | 0.50   | 0.50   |
| EF PCB 132                                                             | 0.49            | 0.49   | 0.50   | 0.50   | 0.50             | 0.49            | 0.50          | 0.50          | 0.48   | 0.50   |
| EF PCB 149                                                             | 0.50            | 0.49   | 0.50   | 0.50   | 0.50             | 0.49            | 0.50          | 0.49          | 0.50   | 0.50   |
| <b>PAH (µg/kg<sub>dw</sub>)</b>                                        |                 |        |        |        |                  |                 |               |               |        |        |
| NAP                                                                    | 26              | 17     | 46     | 31     | 20               | 31              | 56            | 40            | 25     | 14     |
| ACY                                                                    | 5.1             | 4.1    | 6.7    | 6.1    | 3.0              | 4.9             | 4.3           | 3.7           | 3.8    | 1.6    |
| ACE                                                                    | 140             | 8.7    | 42     | 69     | 5.9              | 33              | 21            | 75            | 41     | 4.3    |
| FLU                                                                    | 200             | 9.2    | 71     | 55     | 9.7              | 53              | 34            | 98            | 33     | 8.0    |
| PHE                                                                    | 870             | 56     | 450    | 1200   | 91               | 710             | 550           | 980           | 550    | 180    |
| ANT                                                                    | 94              | 13     | 53     | 100    | 15               | 72              | 46            | 72            | 42     | 13     |
| FLT                                                                    | 2200            | 200    | 830    | 3900   | 350              | 840             | 730           | 1100          | 920    | 370    |
| PYR                                                                    | 1300            | 190    | 660    | 3000   | 220              | 580             | 470           | 830           | 680    | 180    |
| BaA                                                                    | 500             | 220    | 410    | 930    | 360              | 220             | 190           | 340           | 230    | 120    |
| CHR                                                                    | 510             | 380    | 580    | 1100   | 440              | 310             | 310           | 450           | 310    | 180    |
| BbF                                                                    | 270             | 220    | 570    | 660    | 470              | 280             | 240           | 370           | 250    | 150    |
| BkF                                                                    | 160             | 120    | 270    | 360    | 250              | 130             | 110           | 190           | 120    | 69     |
| BaP                                                                    | 210             | 120    | 370    | 330    | 320              | 170             | 110           | 270           | 130    | 94     |
| IPY                                                                    | 180             | 140    | 420    | 360    | 300              | 180             | 140           | 270           | 170    | 110    |
| BPE                                                                    | 190             | 130    | 320    | 260    | 310              | 180             | 140           | 260           | 160    | 120    |
| CPHE                                                                   | 100             | 8.3    | 29     | 100    | 7.5              | 25              | 8.2           | 45            | 18     | 6.8    |
| RET                                                                    | 110             | 29     | 73     | 110    | 65               | 110             | 68            | 89            | 140    | 98     |
| CPYR                                                                   | 18              | 11     | 7.9    | 6      | 9.6              | 8.8             | 5.3           | 8.3           | 5.8    | 6.2    |
| PER                                                                    | 69              | 41     | 87     | 88     | 88               | 58              | 37            | 84            | 48     | 35     |
| COR                                                                    | 93              | 58     | 150    | 97     | 160              | 84              | 69            | 120           | 83     | 61     |
| (MPHE/ANT)/PHE [-]                                                     | 0.51            | 0.75   | 0.43   | 0.52   | 0.58             | 0.32            | 0.32          | 0.29          | 0.37   | 0.51   |
| (MFLT/PYR)/PYR [-]                                                     | 0.31            | 0.6    | 0.37   | 0.25   | 0.75             | 0.28            | 0.25          | 0.28          | 0.23   | 0.38   |
| 1,7-(1,7-&2,6-DmPHE) [-]                                               | 0.56            | 0.61   | 0.64   | 0.58   | 0.63             | 0.6             | 0.57          | 0.60          | 0.62   | 0.67   |
| <b>Heavy metals (mg/kg<sub>dw</sub>)</b>                               |                 |        |        |        |                  |                 |               |               |        |        |
| Cd                                                                     | 0.092           | 0.088  | 0.17   | 0.01   | 0.13             | 0.010           | 0.010         | 0.12          | 0.065  | 0.12   |
| Co                                                                     | 4.2             | 4.6    | 4.5    | 3.4    | 5.3              | 2.7             | 2.6           | 3.1           | 3.2    | 4.2    |
| Cr                                                                     | 19              | 24     | 40     | 21     | 22               | 21              | 21            | 21            | 24     | 24     |
| Cu                                                                     | 57              | 46     | 59     | 56     | 59               | 50              | 44            | 59            | 50     | 86     |
| Ni                                                                     | 13              | 17     | 25     | 15     | 18               | 13              | 14            | 15            | 15     | 22     |
| Pb                                                                     | 54              | 45     | 62     | 36     | 70               | 19              | 22            | 32            | 42     | 48     |
| Zn                                                                     | 150             | 140    | 170    | 130    | 160              | 110             | 120           | 130           | 130    | 170    |

| <b>nutrients (g/kg<sub>dw</sub>)</b>        |      |      |      |      |      |      |      |      |      |      |
|---------------------------------------------|------|------|------|------|------|------|------|------|------|------|
| N                                           | 17   | 16   | 14   | 18   | 13   | 18   | 16   | 16   | 17   | 18   |
| P                                           | 2.9  | 3.1  | 3.1  | 3.9  | 2.9  | 3.6  | 3.7  | 2.9  | 3.6  | 3.4  |
| K                                           | 15   | 14   | 14   | 16   | 9.7  | 13   | 14   | 12   | 15   | 12   |
| Mg                                          | 8.1  | 7.1  | 11   | 10   | 9.3  | 8.0  | 7.6  | 6.8  | 9.7  | 5.1  |
| Ca                                          | 69   | 45   | 69   | 56   | 61   | 67   | 150  | 68   | 60   | 61   |
| <b>Further elements (g/kg<sub>dw</sub>)</b> |      |      |      |      |      |      |      |      |      |      |
| Fe                                          | 8.4  | 12   | 10   | 9.0  | 12   | 8.9  | 9.2  | 9.5  | 9.7  | 10   |
| Mn                                          | 0.36 | 0.59 | 0.49 | 0.45 | 0.59 | 0.42 | 0.40 | 0.41 | 0.44 | 0.37 |
| Na                                          | 0.86 | 1.0  | 0.59 | 1.2  | 0.50 | 2.0  | 1.5  | 1.5  | 1.3  | 0.90 |
| <b>Ancillary data</b>                       |      |      |      |      |      |      |      |      |      |      |
| pH                                          | 8.5  | 8.2  | 8.5  | 8.3  | 8.2  | 8.4  | 8.1  | 8.5  | 8.2  | 8.6  |
| Conductivity (µS/cm)                        | 4200 | 4900 | 3500 | 4300 | 2800 | 3200 | 3900 | 2900 | 3400 | 2400 |

- a) Com: compost, Dig: digestate, all digestate samples were submitted to subsequent aerobic treatment except for samples 80 and 89, PW: presswater
- b) plant code: C: compost, K: organic kitchen waste and green waste as input materials, G: pure green waste compost, U: urban area of input material collection, R: rural area of input material collection
- c) kw: kitchen waste, gw: green waste, iw: industrial waste including paper sludge, coffee ground, tea leaves, residues from potato chips production, biodegradable plastics, edible oil, cacao
- d) characterisation of the area where the input material was collected
- e) season of input material collection
- f) plant type: ab: aerated boxes, atc: aerated trench composting in sheds, bwc: combined box and windrow composting, fec: field-edge composting, mcd: mesophilic aerobic co-digestion, tad: thermophilic aerobic digestion, tbw: table windrows, twh: triangle windrows higher than 2 meters, twl: triangle windrows lower than 2 meters, vc: vermicomposting
- g) contains small amounts of digested material in the compost input material
- h) duration of the treatment process in days
- i) NO<sub>3</sub><sup>-</sup> nd
- j) sieve-width in mm, not: unsieved
- k) NH<sub>4</sub><sup>+</sup> nd

NAP: naphthalene, ACY: acenaphthylene, ACE: acenaphthene, FLU: fluorene, PHE: phenanthrene, ANT: anthracene, FLT: fluoranthene, PYR: pyrene, BaA: benzo[*a*]anthracene, CHR: chrysene, BbF: benzo[*b*]fluoranthene, BkF: benzo[*k*]fluoranthene, BaP: benzo[*a*]pyrene, IPY: indeno[1,2,3-*cd*]pyrene, BPE: benzo[*ghi*]perylene, CPHE: 4-H-cyclopenta[*def*]PHE, RET: retene, CPYR: cyclopenta[*cd*]PYR, COR: coronene, (MPHE&ANT)/PHE: ratio of methylPHE and -ANT to PHE, (MFLT&PYR)/PYR: ratio of methylFLT and -PYR to PYR, 1,7-/(1,7-&2,6-)DmPHE: the ratio of 1,7- to 1,7- and 2,6-dimethylPHE, nd: not detected, na: not available, EF enantiomeric fraction, ww: wet weight, dw: dry weight



Supplementary Material (ESI) for Journal of Environmental Monitoring  
This journal is © The Royal Society of Chemistry 2007

Table S1 (cont.): Sample description, PCB, PAH, heavy metal and nutrient contents of compost, digestate and presswater samples in Switzerland

| Sample No.                                                             | 62              | 63              | 64              | 65              | 66              | 67              | 68     | 69     | 70     | 71              |
|------------------------------------------------------------------------|-----------------|-----------------|-----------------|-----------------|-----------------|-----------------|--------|--------|--------|-----------------|
| Product <sup>a</sup>                                                   | Com             | Com             | Com             | Com             | Com             | Com             | Com    | Com    | Com    | Com             |
| Plant code and number <sup>b</sup>                                     | CKU03           | CKU02           | CKU01           | CGU05           | CGU05           | CGU02           | CGU02  | CGR02  | CGR03  | CGR04           |
| Input material <sup>c</sup>                                            | kw, gw          | kw, gw          | kw, gw, iw      | gw              | gw              | gw, iw          | gw, iw | gw     | gw     | gw              |
| Origin of input material <sup>d</sup>                                  | urban           | urban           | urban           | rural           | rural           | rural           | rural  | rural  | rural  | rural           |
| Season <sup>e</sup>                                                    | winter          | autumn          | autumn          | autumn          | winter          | autumn          | winter | autumn | autumn | winter          |
| Plant type <sup>f</sup>                                                | atc             | ab              | twl             | atc             | atc             | tbw             | tbw    | twh    | twh    | twh             |
| Process duration (days) <sup>h</sup>                                   | 56              | 73              | 73              | 12              | 18              | 94              | 63     | 103    | 72     | 84              |
| Water content [% ww]                                                   | 42              | 57              | 59              | 44              | 50              | 57              | 58     | 51     | 53     | 41              |
| Org matter content [% dw]                                              | 53              | 52              | 46              | 43              | 48              | 52              | 40     | 35     | 29     | 38              |
| Impurity content [% dw]                                                | 0.17            | 0.0089          | 0.021           | 0.082           | 0.4             | 0.036           | nd     | 0.034  | 0.21   | 0.017           |
| Maturity (NO <sub>3</sub> <sup>-</sup> /NH <sub>4</sub> <sup>+</sup> ) | nd <sup>i</sup> | 0.47   | 13     | 1.2    | nd <sup>i</sup> |
| Particle size [mm] <sup>j</sup>                                        | <10             | <20             | <40             | <20             | <20             | <20             | <20    | <20    | <20    | not             |
| <b>PCB (µg/kg<sub>dw</sub>)</b>                                        |                 |                 |                 |                 |                 |                 |        |        |        |                 |
| PCB 28                                                                 | nd              | nd              | nd              | nd              | nd              | nd              | nd     | nd     | nd     | nd              |
| PCB 52                                                                 | 2.9             | 2.2             | 2.5             | 5.9             | 3.6             | 2.6             | 2.6    | 1.8    | 0.92   | 1.4             |
| PCB 95                                                                 | 4.5             | 3.9             | 4.4             | 5.9             | 4.7             | 3.5             | 3.2    | 2.0    | 1.4    | 1.6             |
| PCB 101                                                                | 6.6             | 5.6             | 6.5             | 7.4             | 6.0             | 4.3             | 4.0    | 2.7    | 1.9    | 2.2             |
| PCB 118                                                                | 6.5             | 3.9             | 7.6             | 5.1             | 3.9             | 3.1             | 2.8    | 2.4    | 1.4    | 2.1             |
| PCB 132                                                                | 3.4             | 3.8             | 4.4             | 3.3             | 3.2             | 2.7             | 2.6    | 1.3    | 1.1    | 1.1             |
| PCB 138                                                                | 6.3             | 5.1             | 11              | 7.1             | 5.9             | 4.7             | 4.4    | 2.5    | 2.1    | 2.1             |
| PCB 149                                                                | 4.8             | 4.6             | 5.3             | 5.1             | 4.5             | 3.7             | 3.7    | 2.2    | 2.2    | 1.9             |
| PCB 153                                                                | 6.9             | 9.0             | 10              | 7.2             | 6.5             | 5.5             | 5.5    | 3.5    | 3.2    | 2.9             |
| PCB 174                                                                | 1.4             | 1.1             | 1.3             | 1.8             | 1.2             | 1.2             | 1.2    | 0.96   | 0.85   | 0.87            |
| PCB 180                                                                | 3.2             | 3.3             | 3.8             | 2.5             | 3.0             | 2.4             | 2.8    | 1.7    | 2.1    | 1.7             |
| EF PCB 95                                                              | 0.51            | 0.49            | 0.50            | 0.50            | 0.50            | 0.50            | 0.50   | 0.50   | 0.50   | 0.50            |
| EF PCB 132                                                             | 0.50            | 0.51            | 0.50            | 0.49            | 0.50            | 0.50            | 0.50   | 0.50   | 0.50   | 0.50            |
| EF PCB 149                                                             | 0.49            | 0.50            | 0.50            | 0.49            | 0.49            | 0.50            | 0.49   | 0.50   | 0.50   | 0.49            |
| <b>PAH (µg/kg<sub>dw</sub>)</b>                                        |                 |                 |                 |                 |                 |                 |        |        |        |                 |
| NAP                                                                    | 17              | 54              | 15              | 19              | 18              | 24              | 10     | 5.5    | 16     | 11              |
| ACY                                                                    | 2.1             | 14              | 2.4             | 3.0             | 2.8             | 3.8             | 3.0    | 0.81   | 2.1    | 1.4             |
| ACE                                                                    | 13              | 6.8             | 29              | 84              | 4.0             | 39              | 5.4    | 5.5    | 7.7    | 7.0             |
| FLU                                                                    | 20              | 21              | 59              | 120             | 8.1             | 48              | 11     | 7.6    | 16     | 7.6             |
| PHE                                                                    | 270             | 540             | 430             | 860             | 160             | 300             | 190    | 93     | 120    | 120             |
| ANT                                                                    | 23              | 89              | 31              | 82              | 18              | 44              | 22     | 10     | 14     | 11              |
| FLT                                                                    | 420             | 1200            | 580             | 910             | 1100            | 880             | 630    | 200    | 280    | 240             |
| PYR                                                                    | 290             | 630             | 370             | 620             | 630             | 610             | 340    | 140    | 170    | 190             |
| BaA                                                                    | 150             | 540             | 170             | 310             | 570             | 360             | 280    | 80     | 150    | 66              |
| CHR                                                                    | 190             | 590             | 230             | 360             | 650             | 480             | 410    | 110    | 210    | 97              |
| BbF                                                                    | 150             | 600             | 200             | 300             | 430             | 380             | 380    | 73     | 150    | 62              |
| BkF                                                                    | 80              | 310             | 94              | 160             | 230             | 200             | 170    | 44     | 89     | 37              |
| BaP                                                                    | 110             | 420             | 130             | 230             | 230             | 280             | 260    | 48     | 110    | 39              |
| IPY                                                                    | 110             | 470             | 150             | 200             | 250             | 280             | 280    | 59     | 130    | 54              |
| BPE                                                                    | 110             | 460             | 150             | 200             | 250             | 270             | 260    | 68     | 150    | 62              |
| CPHE                                                                   | 16              | 21              | 34              | 44              | 18              | 50              | 18     | 7.9    | 10     | 7.8             |
| RET                                                                    | 100             | 78              | 81              | 81              | 100             | 120             | 99     | 34     | 35     | 60              |
| CPYR                                                                   | 6.0             | 20              | 6.1             | 4.5             | 12              | 6.1             | 5.7    | 7.0    | 12     | 6.1             |
| PER                                                                    | 38              | 140             | 49              | 70              | 60              | 81              | 81     | 20     | 31     | 14              |
| COR                                                                    | 61              | 210             | 76              | 87              | 110             | 120             | 120    | 41     | 98     | 38              |
| (MPHE/ANT)/PHE [-]                                                     | 0.50            | 0.30            | 0.33            | 0.30            | 0.74            | 0.60            | 0.6    | 0.47   | 0.48   | 0.47            |
| (MFLT/PYR)/PYR [-]                                                     | 0.36            | 0.29            | 0.35            | 0.39            | 0.51            | 0.46            | 0.55   | 0.33   | 0.44   | 0.24            |
| 1,7-(1,7-&2,6-DmPHE) [-]                                               | 0.65            | 0.66            | 0.62            | 0.59            | 0.61            | 0.63            | 0.63   | 0.62   | 0.65   | 0.69            |
| <b>Heavy metals (mg/kg<sub>dw</sub>)</b>                               |                 |                 |                 |                 |                 |                 |        |        |        |                 |
| Cd                                                                     | 0.058           | 0.49            | 0.10            | 0.11            | 0.076           | 0.053           | 0.52   | 0.11   | 0.28   | 0.28            |
| Co                                                                     | 3.6             | 4.2             | 3.5             | 3.6             | 2.9             | 2.9             | 3.8    | 4.3    | 4.2    | 4.2             |
| Cr                                                                     | 22              | 21              | 21              | 26              | 21              | 17              | 20     | 23     | 25     | 25              |
| Cu                                                                     | 110             | 64              | 45              | 48              | 51              | 44              | 51     | 47     | 53     | 87              |
| Ni                                                                     | 20              | 15              | 15              | 17              | 15              | 12              | 14     | 16     | 15     | 20              |
| Pb                                                                     | 150             | 98              | 29              | 41              | 38              | 38              | 42     | 31     | 42     | 42              |
| Zn                                                                     | 160             | 230             | 120             | 170             | 170             | 130             | 150    | 140    | 140    | 140             |

---

**nutrients (g/kg<sub>dw</sub>)**

|    |     |     |     |     |     |     |     |     |     |     |
|----|-----|-----|-----|-----|-----|-----|-----|-----|-----|-----|
| N  | 16  | 20  | 16  | 17  | 18  | 14  | 15  | 15  | 9.8 | 13  |
| P  | 2.9 | 3.5 | 2.5 | 3.7 | 3.2 | 2.6 | 2.9 | 2.8 | 2.5 | 3.1 |
| K  | 7.9 | 17  | 10  | 16  | 13  | 10  | 12  | 12  | 12  | 15  |
| Mg | 4.6 | 4.9 | 4.4 | 4.7 | 4.6 | 5.3 | 6.0 | 6.2 | 10  | 9.2 |
| Ca | 56  | 77  | 71  | 40  | 53  | 75  | 82  | 64  | 38  | 70  |

**Further elements (g/kg<sub>dw</sub>)**

|    |      |      |      |      |      |      |      |      |      |      |
|----|------|------|------|------|------|------|------|------|------|------|
| Fe | 9.3  | 11   | 8.9  | 11   | 9.1  | 7.6  | 10   | 12   | 10   | 9.7  |
| Mn | 0.36 | 0.45 | 0.37 | 0.46 | 0.48 | 0.32 | 0.39 | 0.52 | 0.45 | 1.0  |
| Na | 0.88 | 0.61 | 0.49 | 0.59 | 0.71 | 0.49 | 0.50 | 0.34 | 0.52 | 0.34 |

---

**Ancillary data**

|                      |      |      |      |      |      |      |      |      |      |      |
|----------------------|------|------|------|------|------|------|------|------|------|------|
| pH                   | 8.5  | 8.5  | 8.6  | 8.7  | 8.6  | 8.5  | 8.4  | 8.6  | 8.5  | 8.7  |
| Conductivity (μS/cm) | 1800 | 3400 | 2100 | 3300 | 2400 | 1800 | 1900 | 2400 | 3100 | 2600 |

---

- a) Com: compost, Dig: digestate, all digestate samples were submitted to subsequent aerobic treatment except for samples 80 and 89, PW: presswater  
b) plant code: C: compost, K: organic kitchen waste and green waste as input materials, G: pure green waste compost, U: urban area of input material collection, R: rural area of input material collection  
c) kw: kitchen waste, gw: green waste, iw: industrial waste including paper sludge, coffee ground, tea leaves, residues from potato chips production, biodegradable plastics, edible oil, cacao  
d) characterisation of the area where the input material was collected  
e) season of input material collection  
f) plant type: ab: aerated boxes, atc: aerated trench composting in sheds, bwc: combined box and windrow composting, fec: field-edge composting, mcd: mesophilic aerobic co-digestion, tad: thermophilic aerobic digestion, tbw: table windrows, twh: triangle windrows higher than 2 meters, twl: triangle windrows lower than 2 meters, vc: vermicomposting  
g) contains small amounts of digested material in the compost input material  
h) duration of the treatment process in days  
i) NO<sub>3</sub><sup>-</sup> nd  
j) sieve-width in mm, not: unsieved  
k) NH<sub>4</sub><sup>+</sup> nd

NAP: naphthalene, ACY: acenaphthylene, ACE: acenaphthene, FLU: fluorene, PHE: phenanthrene, ANT: anthracene, FLT: fluoranthene, PYR: pyrene, BaA: benzo[*a*]anthracene, CHR: chrysene, BbF: benzo[*b*]fluoranthene, BkF: benzo[*k*]fluoranthene, BaP: benzo[*a*]pyrene, IPY: indeno[1,2,3-*cd*]pyrene, BPE: benzo[*ghi*]perylene, CPHE: 4-H-cyclopenta[*def*]PHE, RET: retene, CPYR: cylopenta[*cd*]PYR, COR: coronene, (MPHE&ANT)/PHE: ratio of methylPHE and -ANT to PHE, (MFLT&PYR)/PYR: ratio of methylFLT and -PYR to PYR, 1,7-/(1,7-&2,6-)DmPHE: the ratio of 1,7- to 1,7- and 2,6-dimethylPHE, nd: not detected, na: not available, EF enantiomeric fraction, ww: wet weight, dw: dry weight

Supplementary Material (ESI) for Journal of Environmental Monitoring  
This journal is © The Royal Society of Chemistry 2007

Table S1 (cont.): Sample description, PCB, PAH, heavy metal and nutrient contents of compost, digestate and presswater samples in Switzerland

| Sample No.                                                             | 72               | 74              | 76     | 79     | 80              | 81              | 82              | 84              | 85            | 89              |
|------------------------------------------------------------------------|------------------|-----------------|--------|--------|-----------------|-----------------|-----------------|-----------------|---------------|-----------------|
| Product <sup>a</sup>                                                   | Com              | Com             | Com    | Com    | Dig             | Com             | Com             | Dig             | PW            | Dig             |
| Plant code and number <sup>b</sup>                                     | CKU06            | CGU01           | CGR01  | CGU03  | DKU03           | CKU04           | CGU04           | DKU04           | DKU04         | DKU04           |
| Input material <sup>c</sup>                                            | kw, gw,<br>iw    | gw, iw          | gw     | gw     | kw, gw          | kw, gw          | gw              | kw, gw,<br>iw   | kw, gw,<br>iw | kw, gw,<br>iw   |
| Origin of input material <sup>d</sup>                                  | urban            | rural           | rural  | urban  | urban           | urban           | urban           | urban           | urban         | urban           |
| Season <sup>e</sup>                                                    | autumn           | autumn          | winter | autumn | summer          | winter          | winter          | winter          | summer        | summer          |
| Plant type <sup>f</sup>                                                | tbw <sup>g</sup> | twl             | twl    | twh    | tad             | tbw             | twh             | tad             | tad           | tad             |
| Process duration (days) <sup>h</sup>                                   | 142              | 173             | na     | 179    | 16              | 84              | 121             | 49              | 35            | na              |
| Water content [% ww]                                                   | 41               | 44              | 39     | 47     | 52              | 51              | 54              | 51              | 93            | 51              |
| Org matter content [% dw]                                              | 32               | 28              | 24     | 40     | 29              | 56              | 45              | 48              | 47            | 44              |
| Impurity content [% dw]                                                | 0.012            | 0.0069          | 0.012  | 0.015  | 0.078           | 0.05            | 0.014           | 0.2             | na            | 0.15            |
| Maturity (NO <sub>3</sub> <sup>-</sup> /NH <sub>4</sub> <sup>+</sup> ) | 14               | nd <sup>k</sup> | 38     | 33     | nd <sup>i</sup> | nd <sup>i</sup> | nd <sup>i</sup> | nd <sup>i</sup> | na            | nd <sup>i</sup> |
| Particle size [mm] <sup>l</sup>                                        | <10              | <10             | <10    | <20    | <20             | <40             | <20             | <10             | not           | <40             |
| <b>PCB (µg/kg<sub>dw</sub>)</b>                                        |                  |                 |        |        |                 |                 |                 |                 |               |                 |
| PCB 28                                                                 | nd               | nd              | nd     | nd     | nd              | nd              | nd              | nd              | nd            | nd              |
| PCB 52                                                                 | 5.2              | 1.5             | 2.2    | 4.2    | 2.3             | 1.5             | 2.1             | 3.3             | 3.2           | 2.4             |
| PCB 95                                                                 | 4.4              | 2.6             | 8.2    | 6.5    | 3.9             | 1.9             | 2.6             | 3.6             | 4.1           | 4.0             |
| PCB 101                                                                | 5.5              | 3.2             | 9.3    | 8.2    | 4.1             | 2.6             | 3.6             | 4.6             | 6.0           | 5.4             |
| PCB 118                                                                | 4.1              | 2.2             | 3.8    | 6.0    | 3.7             | 2.5             | 3.4             | 4.3             | 5.1           | 3.3             |
| PCB 132                                                                | 2.9              | 2.1             | 6.9    | 4.6    | 2.9             | 1.3             | 1.9             | 2.5             | 3.3           | 3.0             |
| PCB 138                                                                | 5.0              | 4.0             | 11     | 8.5    | 4.8             | 2.3             | 3.4             | 5.5             | 6.8           | 6.6             |
| PCB 149                                                                | 5.4              | 3.5             | 14     | 7.4    | 3.8             | 2.0             | 2.7             | 3.7             | 6.0           | 5.5             |
| PCB 153                                                                | 7.8              | 5.2             | 18     | 11     | 6.9             | 2.9             | 4.0             | 6.0             | 9.3           | 8.7             |
| PCB 174                                                                | 2.1              | 1.2             | 3.9    | 2.2    | 1.3             | 0.66            | 0.99            | 1.3             | 1.7           | 1.5             |
| PCB 180                                                                | 6.1              | 3.1             | 12     | 6.2    | 3.1             | 1.6             | 2.0             | 3.0             | 5.1           | 4.6             |
| EF PCB 95                                                              | 0.49             | 0.50            | 0.50   | 0.50   | 0.50            | 0.50            | 0.51            | 0.51            | 0.51          | 0.51            |
| EF PCB 132                                                             | 0.49             | 0.50            | 0.49   | 0.50   | 0.50            | 0.49            | 0.50            | 0.50            | 0.50          | 0.50            |
| EF PCB 149                                                             | 0.50             | 0.50            | 0.49   | 0.49   | 0.46            | 0.48            | 0.47            | 0.48            | 0.49          | 0.50            |
| <b>PAH (µg/kg<sub>dw</sub>)</b>                                        |                  |                 |        |        |                 |                 |                 |                 |               |                 |
| NAP                                                                    | 8.0              | 11              | 140    | 16     | 88              | 15              | 12              | 150             | 390           | 200             |
| ACY                                                                    | 1.8              | 2.0             | 3.0    | 2.4    | 14              | 2.1             | 2.1             | 21              | 18            | 14              |
| ACE                                                                    | 7.3              | 2.0             | 50     | 2.4    | 160             | 9.2             | 9.9             | 540             | 750           | 610             |
| FLU                                                                    | 7.4              | 3.3             | 46     | 4.9    | 200             | 13              | 23              | 490             | 750           | 660             |
| PHE                                                                    | 73               | 42              | 330    | 80     | 1000            | 170             | 200             | 1800            | 2000          | 2100            |
| ANT                                                                    | 13               | 5.6             | 72     | 10     | 110             | 14              | 14              | 210             | 210           | 300             |
| FLT                                                                    | 230              | 170             | 510    | 350    | 720             | 290             | 410             | 1600            | 1500          | 1600            |
| PYR                                                                    | 160              | 100             | 340    | 150    | 530             | 150             | 300             | 1100            | 1200          | 1200            |
| BaA                                                                    | 190              | 120             | 320    | 160    | 170             | 140             | 190             | 430             | 480           | 520             |
| CHR                                                                    | 230              | 180             | 380    | 320    | 220             | 180             | 270             | 450             | 560           | 540             |
| BbF                                                                    | 170              | 92              | 320    | 300    | 140             | 160             | 230             | 360             | 340           | 440             |
| BkF                                                                    | 110              | 53              | 170    | 120    | 70              | 85              | 120             | 190             | 220           | 240             |
| BaP                                                                    | 120              | 51              | 240    | 160    | 110             | 130             | 160             | 280             | 300           | 370             |
| IPY                                                                    | 130              | 66              | 220    | 220    | 89              | 140             | 180             | 230             | 310           | 280             |
| BPE                                                                    | 150              | 77              | 230    | 220    | 96              | 140             | 190             | 220             | 330           | 270             |
| CPHE                                                                   | 5.1              | 4               | 25     | 6.7    | 69              | 13              | 19              | 120             | 130           | 160             |
| RET                                                                    | 46               | 35              | 74     | 59     | 50              | 200             | 320             | 110             | 94            | 72              |
| CPYR                                                                   | 6.4              | 7.3             | 9.6    | 8.6    | 20              | 13              | 13              | 13              | 33            | 9.3             |
| PER                                                                    | 38               | 18              | 69     | 50     | 40              | 43              | 52              | 93              | 100           | 120             |
| COR                                                                    | 84               | 56              | 110    | 130    | 42              | 68              | 100             | 120             | 210           | 120             |
| (MPHE/ANT)/PHE [-]                                                     | 0.85             | 0.6             | 0.43   | 0.66   | 0.3             | 0.45            | 0.47            | 0.27            | 0.23          | 0.27            |
| (MFLT/PYR)/PYR [-]                                                     | 0.59             | 0.59            | 0.53   | 0.59   | 0.38            | 0.56            | 0.39            | 0.31            | 0.36          | 0.35            |
| 1,7-(1,7-&2,6-DmPHE) [-]                                               | 0.56             | 0.56            | 0.62   | 0.66   | 0.55            | 0.73            | 0.74            | 0.56            | 0.56          | 0.55            |
| <b>Heavy metals (mg/kg<sub>dw</sub>)</b>                               |                  |                 |        |        |                 |                 |                 |                 |               |                 |
| Cd                                                                     | 0.14             | 0.13            | 0.26   | 0.15   | 0.13            | 0.01            | 0.022           | 0.0090          | 0.46          | 0.0059          |
| Co                                                                     | 5.4              | 5.0             | 4.4    | 3.8    | 2.0             | 2.9             | 3.3             | 2.8             | 8.0           | 3.6             |
| Cr                                                                     | 24               | 23              | 19     | 20     | 12              | 19              | 18              | 20              | 50            | 24              |
| Cu                                                                     | 64               | 51              | 38     | 63     | 21              | 54              | 52              | 69              | 100           | 50              |
| Ni                                                                     | 18               | 19              | 16     | 16     | 8.2             | 15              | 15              | 14              | 39            | 17              |
| Pb                                                                     | 48               | 37              | 25     | 47     | 19              | 26              | 30              | 25              | 73            | 32              |
| Zn                                                                     | 160              | 150             | 120    | 190    | 60              | 110             | 140             | 120             | 340           | 110             |

| <b>nutrients (g/kg<sub>dw</sub>)</b>        |      |      |      |      |      |      |      |      |      |      |
|---------------------------------------------|------|------|------|------|------|------|------|------|------|------|
| N                                           | 21   | 15   | 12   | 18   | 9.4  | 13   | 16   | 13   | 25   | 12   |
| P                                           | 4.0  | 3.4  | 2.6  | 2.9  | 2.0  | 1.9  | 2.6  | 2.8  | 6.5  | 3.1  |
| K                                           | 15   | 10   | 9.7  | 12   | 6.4  | 8.8  | 11   | 8.5  | 33   | 11   |
| Mg                                          | 11   | 4.7  | 6.7  | 8    | 6.2  | 3.7  | 5.3  | 5.7  | 9.1  | 6.4  |
| Ca                                          | 71   | 66   | 61   | 66   | 150  | 47   | 61   | 59   | 31   | 64   |
| <b>Further elements (g/kg<sub>dw</sub>)</b> |      |      |      |      |      |      |      |      |      |      |
| Fe                                          | 14   | 12   | 11   | 10   | 5.4  | 7.7  | 8.8  | 9.7  | 19   | 12   |
| Mn                                          | 0.53 | 0.58 | 0.55 | 0.45 | 0.27 | 0.32 | 0.38 | 0.40 | 0.80 | 0.52 |
| Na                                          | 0.65 | 0.44 | 0.41 | 0.30 | 1.2  | 0.55 | 0.54 | 1.7  | 4.2  | 1.3  |
| <b>Ancillary data</b>                       |      |      |      |      |      |      |      |      |      |      |
| pH                                          | 7.9  | 8.3  | 8.4  | 8.5  | 8.5  | 8.6  | 8.6  | 8.5  | na   | 8.6  |
| Conductivity (µS/cm)                        | 6200 | 2900 | 3300 | 2500 | 3000 | 1600 | 2300 | 2900 | na   | 2600 |

- a) Com: compost, Dig: digestate, all digestate samples were submitted to subsequent aerobic treatment except for samples 80 and 89, PW: presswater
- b) plant code: C: compost, K: organic kitchen waste and green waste as input materials, G: pure green waste compost, U: urban area of input material collection, R: rural area of input material collection
- c) kw: kitchen waste, gw: green waste, iw: industrial waste including paper sludge, coffee ground, tea leaves, residues from potato chips production, biodegradable plastics, edible oil, cacao
- d) characterisation of the area where the input material was collected
- e) season of input material collection
- f) plant type: ab: aerated boxes, atc: aerated trench composting in sheds, bwc: combined box and windrow composting, fec: field-edge composting, mcd: mesophilic aerobic co-digestion, tad: thermophilic aerobic digestion, tbw: table windrows, twh: triangle windrows higher than 2 meters, twl: triangle windrows lower than 2 meters, vc: vermicomposting
- g) contains small amounts of digested material in the compost input material
- h) duration of the treatment process in days
- i) NO<sub>3</sub><sup>-</sup> nd
- j) sieve-width in mm, not: unsieved
- k) NH<sub>4</sub><sup>+</sup> nd

NAP: naphthalene, ACY: acenaphthylene, ACE: acenaphthene, FLU: fluorene, PHE: phenanthrene, ANT: anthracene, FLT: fluoranthene, PYR: pyrene, BaA: benzo[*a*]anthracene, CHR: chrysene, BbF: benzo[*b*]fluoranthene, BkF: benzo[*k*]fluoranthene, BaP: benzo[*a*]pyrene, IPY: indeno[1,2,3-*cd*]pyrene, BPE: benzo[*ghi*]perylene, CPHE: 4-H-cyclopenta[*def*]PHE, RET: retene, CPYR: cyclopenta[*cd*]PYR, COR: coronene, (MPHE&ANT)/PHE: ratio of methylPHE and -ANT to PHE, (MFLT&PYR)/PYR: ratio of methylFLT and -PYR to PYR, 1,7-/(1,7-&2,6-)DmPHE: the ratio of 1,7- to 1,7- and 2,6-dimethylPHE, nd: not detected, na: not available, EF enantiomeric fraction, ww: wet weight, dw: dry weight

Supplementary Material (ESI) for Journal of Environmental Monitoring  
This journal is © The Royal Society of Chemistry 2007

Table S1 (cont.): Sample description, PCB, PAH, heavy metal and nutrient contents of compost, digestate and presswater samples in Switzerland

| Sample No.                                                             | 90            | 91     |
|------------------------------------------------------------------------|---------------|--------|
| Product <sup>a</sup>                                                   | PW            | PW     |
| Plant code and number <sup>b</sup>                                     | DKU04         | DKU02  |
| Input material <sup>c</sup>                                            | kw, gw,<br>iw | kw, gw |
| Origin of input material <sup>d</sup>                                  | urban         | urban  |
| Season <sup>e</sup>                                                    | summer        | summer |
| Plant type <sup>f</sup>                                                | tad           | tad    |
| Process duration (days) <sup>h</sup>                                   | 7             | 7      |
| Water content [% ww]                                                   | 85            | 85     |
| Org matter content [% dw]                                              | 39            | 42     |
| Impurity content [% dw]                                                | na            | na     |
| Maturity (NO <sub>3</sub> <sup>-</sup> /NH <sub>4</sub> <sup>+</sup> ) | na            | na     |
| Particle size [mm] <sup>i</sup>                                        | not           | not    |
| <b>PCB (µg/kg<sub>dw</sub>)</b>                                        |               |        |
| PCB 28                                                                 | nd            | nd     |
| PCB 52                                                                 | 2.0           | 2.0    |
| PCB 95                                                                 | 2.6           | 2.9    |
| PCB 101                                                                | 3.5           | 3.9    |
| PCB 118                                                                | 3.0           | 3.6    |
| PCB 132                                                                | 2.2           | 2.4    |
| PCB 138                                                                | 3.9           | 4.5    |
| PCB 149                                                                | 3.7           | 4.1    |
| PCB 153                                                                | 5.6           | 6.4    |
| PCB 174                                                                | 1.1           | 1.3    |
| PCB 180                                                                | 3.1           | 3.7    |
| EF PCB 95                                                              | 0.49          | 0.50   |
| EF PCB 132                                                             | 0.50          | 0.49   |
| EF PCB 149                                                             | 0.49          | 0.49   |
| <b>PAH (µg/kg<sub>dw</sub>)</b>                                        |               |        |
| NAP                                                                    | 240           | 280    |
| ACY                                                                    | 11            | 11     |
| ACE                                                                    | 390           | 260    |
| FLU                                                                    | 500           | 290    |
| PHE                                                                    | 1400          | 1200   |
| ANT                                                                    | 220           | 140    |
| FLT                                                                    | 1100          | 1000   |
| PYR                                                                    | 810           | 770    |
| BaA                                                                    | 320           | 290    |
| CHR                                                                    | 370           | 350    |
| BbF                                                                    | 310           | 290    |
| BkF                                                                    | 160           | 150    |
| BaP                                                                    | 250           | 250    |
| IPY                                                                    | 210           | 220    |
| BPE                                                                    | 210           | 220    |
| CPHE                                                                   | 110           | 86     |
| RET                                                                    | 50            | 45     |
| CPYR                                                                   | 10            | 13     |
| PER                                                                    | 80            | 81     |
| COR                                                                    | 140           | 130    |
| (MPHE/ANT)/PHE [-]                                                     | 0.27          | 0.26   |
| (MFLT/PYR)/PYR [-]                                                     | 0.39          | 0.37   |
| 1,7-(1,7-&2,6-DmPHE) [-]                                               | 0.55          | 0.58   |
| <b>Heavy metals (mg/kg<sub>dw</sub>)</b>                               |               |        |
| Cd                                                                     | 0.23          | 0.16   |
| Co                                                                     | 6.1           | 5.6    |
| Cr                                                                     | 40            | 37     |
| Cu                                                                     | 77            | 72     |
| Ni                                                                     | 31            | 27     |
| Pb                                                                     | 57            | 60     |
| Zn                                                                     | 250           | 260    |

---

**nutrients (g/kg<sub>dw</sub>)**

|    |     |     |
|----|-----|-----|
| N  | 21  | 23  |
| P  | 5.2 | 6.2 |
| K  | 26  | 31  |
| Mg | 8.5 | 11  |
| Ca | 32  | 37  |

**Further elements (g/kg<sub>dw</sub>)**

|    |      |      |
|----|------|------|
| Fe | 16   | 13   |
| Mn | 0.63 | 0.62 |
| Na | 2.8  | 2.7  |

---

**Ancillary data**

|                      |    |    |
|----------------------|----|----|
| pH                   | na | na |
| Conductivity (μS/cm) | na | na |

---

- a) Com: compost, Dig: digestate, all digestate samples were submitted to subsequent aerobic treatment except for samples 80 and 89, PW: presswater  
b) plant code: C: compost, K: organic kitchen waste and green waste as input materials, G: pure green waste compost, U: urban area of input material collection, R: rural area of input material collection  
c) kw: kitchen waste, gw: green waste, iw: industrial waste including paper sludge, coffee ground, tea leaves, residues from potato chips production, biodegradable plastics, edible oil, cacao  
d) characterisation of the area where the input material was collected  
e) season of input material collection  
f) plant type: ab: aerated boxes, atc: aerated trench composting in sheds, bwc: combined box and windrow composting, fec: field-edge composting, mcd: mesophilic aerobic co-digestion, tad: thermophilic aerobic digestion, tbw: table windrows, twh: triangle windrows higher than 2 meters, twl: triangle windrows lower than 2 meters, vc: vermicomposting  
g) contains small amounts of digested material in the compost input material  
h) duration of the treatment process in days  
i) NO<sub>3</sub><sup>-</sup> nd  
j) sieve-width in mm, not: unsieved  
k) NH<sub>4</sub><sup>+</sup> nd

NAP: naphthalene, ACY: acenaphthylene, ACE: acenaphthene, FLU: fluorene, PHE: phenanthrene, ANT: anthracene, FLT: fluoranthene, PYR: pyrene, BaA: benzo[*a*]anthracene, CHR: chrysene, BbF: benzo[*b*]fluoranthene, BkF: benzo[*k*]fluoranthene, BaP: benzo[*a*]pyrene, IPY: indeno[1,2,3-*cd*]pyrene, BPE: benzo[*ghi*]perylene, CPHE: 4-H-cyclopenta[*def*]PHE, RET: retene, CPYR: cyclopenta[*cd*]PYR, COR: coronene, (MPHE&ANT)/PHE: ratio of methylPHE and -ANT to PHE, (MFLT&PYR)/PYR: ratio of methylFLT and -PYR to PYR, 1,7-/(1,7-&2,6-)DmPHE: the ratio of 1,7- to 1,7- and 2,6-dimethylPHE, nd: not detected, na: not available, EF enantiomeric fraction, ww: wet weight, dw: dry weight

Supplementary Material (ESI) for Journal of Environmental Monitoring  
This journal is © The Royal Society of Chemistry 2007

Table S2: Aerial deposition rates of PCB and PAH and their content in manure, sewage sludge and background soils.

|                                  | deposition rate, mean<br>(min, max)               | Ref              | manure, mean (min, max)                          | Ref          | sewage sludge, mean<br>(min, max)                    | Ref          | soil (mean)                             | Ref           |
|----------------------------------|---------------------------------------------------|------------------|--------------------------------------------------|--------------|------------------------------------------------------|--------------|-----------------------------------------|---------------|
| $\Sigma 7\text{PCB}^{\text{a}}$  | 12 mg/ha/y (3.72-68)                              | <sup>5,6</sup>   | 20 $\mu\text{g}/\text{kg}_{\text{dw}}$ (8-42)    | <sup>7</sup> | 100 $\mu\text{g}/\text{kg}_{\text{dw}}$ (38-152)     | <sup>8</sup> | 2.5 $\mu\text{g}/\text{kg}_{\text{dw}}$ | <sup>9</sup>  |
| $\Sigma 16\text{PAH}^{\text{b}}$ | 1.61 g/ha/y (0.14 <sup>c</sup> -19 <sup>d</sup> ) | <sup>10-12</sup> | 150 $\mu\text{g}/\text{kg}_{\text{dw}}$ (66-339) | <sup>7</sup> | 6.9 $\mu\text{g}/\text{kg}_{\text{dw}}$ (1.01-22.64) | <sup>8</sup> | 225 $\mu\text{g}/\text{kg}_{\text{dw}}$ | <sup>13</sup> |

a) Sum of PCB 28, 52, 101, 118, 138, 153, 180

b) Sum of 16 PAH defined by the US EPA

c)  $\Sigma 16\text{PAH}$  except naphthalene, but with acefenantrilene, benzo[*a*]fluorene, benzo[*ghi*]fluoranthene, cyclopenta[*cd*]pyrene, triphenylene, benzo[*b*]fluoranthene, benzo[*e*]pyrene, perylene, indeno[7,1,2,3-*cd*]chrysene, coronene

d)  $\Sigma 16\text{PAH}$  without naphthalene and indeno[1,2,3-*cd*]pyrene

Table S3: Phosphate content of manure, sewage sludge, compost, digestate and presswater and resulting application rates per hectare (ha).

|               | phosphate content ( $\text{P}_2\text{O}_5$ ) ( $\text{g}/\text{kg}_{\text{dw}}$ )                                                                                                                                                             | Reference         | Application rate ( $t_{\text{dw}}/\text{ha}$ ) for a fertilizing effect of 70kg/ha $\text{P}_2\text{O}_5$ |
|---------------|-----------------------------------------------------------------------------------------------------------------------------------------------------------------------------------------------------------------------------------------------|-------------------|-----------------------------------------------------------------------------------------------------------|
| manure        | dairy cow manure: 20<br>dairy followers manure: 20<br>suckler cow manure: 19<br>beef cattle manure: 19<br>gestating sow manure: 64<br>nursing sow manure: 64<br>boar manure: 64<br>piglets manure (till 25kg): 88<br>fattening pig manure: 88 | <sup>14</sup>     | 2.9                                                                                                       |
| sewage sludge | 61                                                                                                                                                                                                                                            | <sup>15</sup>     | 1.1                                                                                                       |
| compost       | 6.9                                                                                                                                                                                                                                           | median this study | 10.1                                                                                                      |
| digestate     | 7.2                                                                                                                                                                                                                                           | median this study | 9.7                                                                                                       |
| presswater    | 14.2                                                                                                                                                                                                                                          | median this study | 4.9                                                                                                       |

Table S4: Characteristic PAH ratios, molecular markers, and respective values in compost and digestate

|                       | <b>petrogenic<sup>a</sup></b>             | <b>pyrogenic<sup>a</sup></b>           | <b>Swiss compost<sup>b</sup></b> | <b>compost con<sup>c</sup></b> |
|-----------------------|-------------------------------------------|----------------------------------------|----------------------------------|--------------------------------|
| ANT/(ANT&PHE)         | <0.1 <sup>d</sup>                         | >0.1 <sup>d</sup>                      | 0.10 (0.05;0.19)                 | <; 0.05 (0.03;0.10)            |
| BaA/(BaA&CHR)         | <0.2 <sup>d</sup>                         | >0.35 <sup>d</sup>                     | 0.42 (0.27;0.50)                 | =; 0.55 (0.39;0.63)            |
| FLT/(FLT&PYR)         | <0.4 <sup>d</sup>                         | >0.4 <sup>d</sup>                      | 0.60 (0.45;0.75)                 | =; 0.47 (0.31;0.64)            |
| IPY/(IPY&BPE)         | <0.2 <sup>d</sup>                         | >0.2 <sup>d</sup>                      | 0.50 (0.44;0.61)                 | =; 0.58 (0.46;0.63)            |
| ComPAH/Σ16PAH         | 0.3 <sup>d</sup>                          | 0.7 <sup>d</sup>                       | 0.87 (0.43;0.96) <sup>e</sup>    | <; na <sup>f</sup>             |
| (MPHE&ANT)/PHE        | 5 <sup>d</sup>                            | 0.5 <sup>d</sup>                       | 0.47 (0.22;3.07)                 | ><; na <sup>f</sup>            |
| (MFLT&PYR)/PYR        | 4 <sup>d</sup>                            | 0.3 <sup>d</sup>                       | 0.37 (0.23;0.75)                 | =/>; na <sup>f</sup>           |
| 1,7-/(1,7-&2,6-)DmPHE | 0.45-0.7 <sup>d,g</sup>                   | <0.45 or 0.7-0.9 <sup>d</sup>          | 0.63 (0.50;0.76)                 | =; na <sup>f</sup>             |
|                       | <b>fuel combustion</b>                    | <b>grass/wood/coal combustion</b>      |                                  |                                |
| FLT/(FLT&PYR)         | 0.4-0.5 <sup>d</sup>                      | >0.5 <sup>d</sup>                      | 0.6 (0.43;0.75)                  | =; 0.47 (0.31;0.64)            |
| IPY/(IPY&BPE)         | 0.2-0.5 <sup>d</sup>                      | >0.5 <sup>d</sup>                      | 0.5 (0.44;0.61)                  | =; 0.58 (0.46;0.63)            |
| RET/(RET&CHR)         | 0.15-0.5 <sup>h</sup>                     | 0.83 <sup>i</sup> /0.96 <sup>h,i</sup> | 0.19 (0.03;0.54)                 | >/=; na <sup>f</sup>           |
| 1,7-/(1,7-&2,6-)DmPHE | <0.45 <sup>d,j</sup>                      | 0.7-0.9 <sup>d,i</sup>                 |                                  | =; na <sup>f</sup>             |
|                       | <b>diagenetic</b>                         | <b>pyrogenic</b>                       |                                  |                                |
| PER/Σ16PAH            | >0.05 <sup>k</sup>                        | <0.05 <sup>k</sup>                     | 0.02 (0, 0.06)                   | ><; na <sup>f</sup>            |
|                       | <b>non-traffic</b>                        | <b>traffic</b>                         |                                  |                                |
| BaP/BPE               | <0.6 <sup>d</sup>                         | >0.6 <sup>d</sup>                      | 0.90 (0.53;1.4)                  | =; 1.50 (0.89;2.34)            |
| 1,7-/(1,7-&2,6-)DmPHE | >0.45 <sup>d</sup>                        | <0.45 <sup>d</sup>                     |                                  | =; na <sup>f</sup>             |
| <b>Markers</b>        |                                           |                                        |                                  |                                |
| COR/Σ15PAH            | COR: vehicle exhaust <sup>e</sup>         |                                        | 0.03 (0.003;0.12) <sup>e</sup>   | </=; na <sup>e</sup>           |
| CPHE/Σ15PAH           | CPHE: pyrogenic marker <sup>l</sup>       |                                        | 0.01 (0;0.02) <sup>e</sup>       | >; na <sup>e</sup>             |
| CPYR/Σ15PAH           | CPYR: wood or traffic marker <sup>m</sup> |                                        | 0.003 (0;0.017) <sup>e</sup>     | >; na <sup>e</sup>             |

a) prevalent discrimination levels

b) median (min, max) n=69

c) quantitative alteration during composting<sup>16</sup> and ratios after applying conversion factor for air particles suggested by Zhang<sup>4</sup>

d) characteristic ratio according to<sup>13</sup> and references therein

e) dibenzo(*a,h*)anthracene was not determined, instead of Σ16PAH it is referred to Σ15PAH

f) conversion factor not available

g) also mixed combustion sources

h)<sup>17</sup>

i) softwood combustion,

j) vehicle emission,

k)<sup>18</sup>

l)<sup>19</sup>

m)<sup>20, 21</sup>

ANT: anthracene, PHE: phenanthrene, BaA: benzo[*a*]anthracene; CHR: chrysene; FLU: fluoranthene, PYR: pyrene, IPY: indeno[*1,2,3-cd*]pyrene, BPE: benzo[*ghi*]perylene (BPE), ComPAH (Sum of FLT, PYR, BaA, CHR, benzo[*b*]fluoranthene, benzo[*k*]fluoranthene, benzo[*a*]pyrene (BaP), IPY, BPE), M: methylated, Dm: dimethylated, RET: retene, PER: perylene, COR: coronene COR, CPHE: 4-H cyclopenta[*def*]PHE, CPYR: cyclopenta[*cd*]PYR



Table S5: References of emission profiles used to compare PAH source profiles from compost with

| Source type               | Reference                    |
|---------------------------|------------------------------|
| asphalt                   | 22                           |
| break particles           | 23                           |
| coal                      | 24                           |
| coal combustion           | 24-30                        |
| coal tar                  | 31                           |
| Diesel                    | 32-37                        |
| Diesel soot               | 25, 32, 33, 35, 37-42        |
| dust                      | 43                           |
| gasoline                  | 34, 44                       |
| gasoline soot             | 25, 38, 40, 41, 44-49        |
| green waste combustion    | 30, 50, 51                   |
| kerosene                  | 36                           |
| kerosene combustion       | 52                           |
| lawn mower                | 53                           |
| oil                       | 32, 36, 54                   |
| oil burning soot          | 38, 46                       |
| orimulsion®*              | 36                           |
| residue of Diesel burning | 37                           |
| road dust                 | 23                           |
| tar                       | 32                           |
| tire wear                 | 23                           |
| traffic emission          | 25, 55                       |
| waste combustion          | 30, 55, 56                   |
| weathered oil             | 36                           |
| wood ash                  | 57                           |
| wood combustion           | 20, 25-28, 38, 52, 56, 58-64 |

\*bitumen-based fuel

Table S6: Limit and guide values respectively for organic pollutants in compost in different European countries <sup>65-67</sup>

|                      | Austria                                              | Denmark                          | Luxemburg               | France                  | Switzerland           |
|----------------------|------------------------------------------------------|----------------------------------|-------------------------|-------------------------|-----------------------|
| PCB <sup>a</sup>     | 1 mg/kg <sub>dw</sub>                                |                                  | 0.1 mg/kg <sub>dw</sub> |                         |                       |
| PAH <sup>b</sup>     | 6 mg/kg <sub>dw</sub>                                | 3 mg/kg <sub>dw</sub>            | 10 mg/kg <sub>dw</sub>  |                         | 4 mg/kg <sub>dw</sub> |
| Fluoranthene         |                                                      |                                  |                         | 4 mg/kg <sub>dw</sub>   |                       |
| Benzo(b)fluoranthene |                                                      |                                  |                         | 2.5 mg/kg <sub>dw</sub> |                       |
| Benzo(a)pyrene       |                                                      |                                  |                         | 1.5 mg/kg <sub>dw</sub> |                       |
| Remarks              | Limit values for mixed municipal solid waste compost | Limit value for biowaste compost | guide value             |                         | guide value           |

<sup>a</sup>PCB: polychlorinated biphenyls; <sup>b</sup>PAH: polycyclic aromatic hydrocarbons, sum of 16 PAH defined by US EPA

In some countries such as Austria, Germany, the Netherlands, Sweden and Belgium, voluntary quality assurance systems have been established <sup>65</sup>

Supplementary Material (ESI) for Journal of Environmental Monitoring  
This journal is © The Royal Society of Chemistry 2007

Table S7: Estimated effects of factors and coefficients of continuous variables kept in the final linear model explaining enantiomeric fractions of atropisomeric PCB in compost and digestate<sup>a</sup> along with corresponding values of  $r^2$ , the coefficient of determination<sup>b</sup>.

|                                                                      | EF PCB 95    | EF PCB 132   | EF PCB 149    |
|----------------------------------------------------------------------|--------------|--------------|---------------|
| Treatment process (anaerobic/aerobic)                                | <b>0.002</b> | 0.001        | <b>-0.003</b> |
| Season of input material collection (autumn/remaining year)          | -0.001       | -0.00007     | 0.001         |
| Season of input material collection ((summer/spring)/remaining year) | -0.001       | <b>0.003</b> | -0.003        |
| Duration of the treatment process                                    | -0.001       | 0.002        | -0.001        |
| $r^2$ of the model                                                   | 0.20         | 0.07         | 0.20          |

a) significant effects and coefficients are bold for  $p\text{-value} \leq 0.05$  and italic for  $0.05 < p\text{-value} \leq 0.1$ . Positive values of effects imply higher concentrations in first level and positive coefficients imply higher concentrations with higher values of the predictor.

b)  $r^2$  is the fraction of explained variation by the model. It varies between 0 and 1 with the higher the value the more successful is the linear model in explaining the variation in the responses.

Table S8 Estimated effects of factors and coefficients of continuous variables kept in the final linear model explaining characteristic PAH ratios in compost and digeate and corresponding coefficients along with corresponding values of  $r^2$ , the coefficient of determination<sup>b</sup>.

|                                                                      | FLT/<br>(FLT&PYR) | BaA/<br>(BaA&CHR) | IPY/<br>(IPY&BPE) | BaP/BPE       | 1,7-(1,7-&<br>2,6DmPHE) |
|----------------------------------------------------------------------|-------------------|-------------------|-------------------|---------------|-------------------------|
| Treatment process (anaerobic/aerobic)                                | -0.013            | 0.007             | 0.005             | <b>0.066</b>  | <b>-0.029</b>           |
| Season of input material collection (autumn/remaining year)          | <b>0.020</b>      | -0.011            | <b>-0.018</b>     | <b>-0.106</b> | 0.001                   |
| Season of input material collection ((summer/spring)/remaining year) | <b>-0.024</b>     | 0.002             | <b>0.030</b>      | <b>0.080</b>  | -0.012                  |
| Particle size (>20 mm / ≤20mm)                                       | <i>-0.027</i>     | <i>0.019</i>      | 0.001             | <i>0.079</i>  | -0.019                  |
| Maturity (NO <sub>3</sub> /NH <sub>4</sub> <sup>+</sup> )            | <i>0.030</i>      | <b>-0.062</b>     | -0.005            | <b>-0.160</b> | 0.010                   |
| $r^2$ of the model                                                   | 0.19              | 0.31              | 0.38              | 0.35          | 0.29                    |

a) significant effects and coefficients are bold for  $p\text{-value} \leq 0.05$  and italic for  $0.05 < p\text{-value} \leq 0.1$ . Positive values of effects imply higher concentrations in first level and positive coefficients imply higher concentrations with higher values of the predictor.

b)  $r^2$  is the fraction of explained variation by the model. It varies between 0 and 1 with the higher the value the more successful is the linear model in explaining the variation in the responses.

## References

- 1 Y. Chen, Y. Inbar, B. Chefetz and Y. Hadar, in *Modern Agriculture and the Environment*, eds. D. Rosen, E. Tel-Or, Y. Hadar and Y. Chen, Kluwer Academic Publisher, Dordrecht, The Netherlands, Editon edn., 1997, pp. 342-362.
- 2 J. Fuchs, U. Gall, K. Schleiss and A. Wellinger. VKS-Richtlinie 2001:Qualitätseigenschaften von Komposten und Gärgut aus der  
5 Grüngutbewirtschaftung; Verband Kompostwerke Schweiz (VKS) in Zusammenarbeit mit dem Biogas Forum Schweiz: 2001. [http://www.vks-asic.ch/acrobatreader/vks\\_richtlinie\\_layout.pdf](http://www.vks-asic.ch/acrobatreader/vks_richtlinie_layout.pdf) (last accessed: July 2006).
- 3 M. Hügi and R. Kettler, *Abfallstatistik 2002, mit Daten der KVA Planung 2003, Umweltmaterialien 186*, Bundesamt für Umwelt, Wald und Landschaft BUWAL, Bern, 2004.
- 4 X. L. Zhang, S. Tao, W. X. Liu, Y. Yang, Q. Zuo and S. Z. Liu, *Environ. Sci. Technol.*, 2005, **39**, 9109-9114.
- 10 5 G. Carrera, P. Fernandez, J. O. Grimalt, M. Ventura, L. Camarero, J. Catalan, U. Nickus, H. Thies and R. Psenner, *Environ. Sci. Technol.*, 2002, **36**, 2581-2588.
- 6 A. R. Fernandes, B. R. Bushby, J. E. Faulkner, D. S. Wallace, P. Clayton and B. J. Davis, *Chemosphere*, 1992, **25**, 1311-1316.
- 7 J. D. Berset and R. Holzer, *Intern. J. Environ. Anal. Chem.*, 1995, **59**, 145-165.
- 8 J. D. Berset and R. Holzer, *J. Chromatogr. A*, 1999, **852**, 545-558.
- 9 P. Schmid, E. Gujer, M. Zennegg, T. Bucheli and A. Desaulles, *Chemosphere*, 2005, **58**, 227-234.
- 10 S. Azimi, V. Rocher, M. Muller, R. Moilleron and D. R. Thevenot, *Sci. Total Environ.*, 2005, **337**, 223-239.
- 11 P. Fernandez, G. Carrera, J. O. Grimalt, M. Ventura, L. Camarero, J. Catalan, U. Nickus, H. Thies and R. Psenner, *Environ. Sci. Technol.*, 2003, **37**, 3261-3267.
- 12 C. J. Halsall, P. J. Coleman and K. C. Jones, *Chemosphere*, 1997, **35**, 1919-1931.
- 20 13 T. D. Bucheli, F. Blum, A. Desaulles and Ö. Gustafsson, *Chemosphere*, 2004, **56**, 1061-1076.
- 14 U. Walther, J.-P. Rieser and R. Fliesch, *Grundlagen für die Düngung im Futter- und Ackerbau (GRUDAF)*, FAL Agroscope Reckenholz, Zürich, 2001.
- 15 D. Külling, T. Candinas and F. X. Stadelmann, *Agrarforschung*, 2002, **9**, 200-205.
- 16 R. C. Brändli, T. D. Bucheli, T. Kupper, J. Mayer, F. X. Stadelmann and J. Tarradellas, *Environmental Pollution*, 2006.
- 25 17 B. Z. Yan, T. A. Abrajano, R. F. Bopp, D. A. Chaky, L. A. Benedict and S. N. Chillrud, *Environ. Sci. Technol.*, 2005, **39**, 7012-7019.
- 18 M. I. Venkatesan, *Marine Chemistry*, 1988, **25**, 1-27.
- 19 P. Garrigues, H. Budzinski, M. P. Manitz and S. A. Wise, *Polycycl. Aromat. Compd.*, 1995, **7**, 275-284.
- 20 E. Hedberg, A. Kristensson, M. Ohlsson, C. Johansson, P. A. Johansson, E. Swietlicki, V. Vesely, U. Wideqvist and R. Westerholm, *Atmos. Environ.*, 2002, **36**, 4823-4837.
- 30 21 B. R. T. Simoneit, *Applied Geochemistry*, 2002, **17**, 129-162.
- 22 Tiefbauamt des Kanton Thurgau. Polyaromatic hydrocarbons in asphalt, Analyses performed within the directive of July 1997 for the recycling of mineral building waste (unpublished data); Frauenfeld, 2006.
- 23 W. F. Rogge, L. M. Hildemann, M. A. Mazurek, G. R. Cass and B. R. T. Simoneit, *Environ. Sci. Technol.*, 1993, **27**, 1892-1904.
- 24 Y. J. Chen, X. H. Bi, B. X. Mai, G. Y. Sheng and J. M. Fu, *Fuel*, 2004, **83**, 781-790.
- 35 25 N. R. Khalili, P. A. Scheff and T. M. Holsen, *Atmos. Environ.*, 1995, **29**, 533-542.
- 26 R. G. M. Lee, P. Coleman, J. L. Jones, K. C. Jones and R. Lohmann, *Environ. Sci. Technol.*, 2005, **39**, 1436-1447.
- 27 N. T. K. Oanh, L. B. Reutergardh and N. T. Dung, *Environ. Sci. Technol.*, 1999, **33**, 2703-2709.
- 28 N. T. K. Oanh, D. O. Albina, L. Ping and X. K. Wang, *Biomass Bioenerg.*, 2005, **28**, 579-590.
- 29 M. J. Wornat, E. B. Ledesma, A. K. Sandrowitz, M. J. Roth, S. M. Dawsey, Y. L. Qiao and W. Chen, *Environ. Sci. Technol.*, 2001, **35**, 1943-1952.
- 40 30 M. Kalaitzoglou, E. Terzi and C. Samara, *Atmospheric Environment*, 2004, **38**, 2545-2560.
- 31 National Institute of Standards and Technology; Complex mixture of polycyclic aromatic hydrocarbons from coal tar, [https://srms.nist.gov/certificates/1597A.pdf?CFID=4797534&CFTOKEN=dc325aefca268cb0-57C0FEE1-B30D-E6D0-B31D069A1B98CB7D&jsessionid=b43058f04237\\$FE\\$E0o\\$](https://srms.nist.gov/certificates/1597A.pdf?CFID=4797534&CFTOKEN=dc325aefca268cb0-57C0FEE1-B30D-E6D0-B31D069A1B98CB7D&jsessionid=b43058f04237$FE$E0o$) (last accessed, July 2006)
- 32 A. E. Bence, K. A. Kvenvolden and M. C. Kennicutt, *Org. Geochem.*, 1996, **24**, 7-42.
- 45 33 S. J. Chen, L. T. Hsieh and S. C. Chiu, *Sci. Total Environ.*, 2003, **313**, 61-76.
- 34 L. C. Marr, T. W. Kirchstetter, R. A. Harley, A. H. Miguel, S. V. Hering and S. K. Hammond, *Environ. Sci. Technol.*, 1999, **33**, 3091-3099.
- 35 H. H. Mi, W. J. Lee, C. B. Chen, H. H. Yang and S. J. Wu, *Chemosphere*, 2000, **41**, 1783-1790.
- 36 Z. Wang, B. P. Hollebone, M. Fingas, B. Fieldhouse, L. Sigouin, M. Landriault, P. Smith, J. Noonan and G. Thouin, *Characteristics of Spilled Oils, Fuels, and Petroleum Products: 1. Composition and Properties of Selected Oils*, Environment Canada, Ontario, CA, 2003.
- 50 37 Z. D. Wang, M. Fingas, Y. Y. Shu, L. Sigouin, M. Landriault, P. Lambert, R. Turpin, P. Campagna and J. Mullin, *Environ. Sci. Technol.*, 1999, **33**, 3100-3109.
- 38 C.-E. Boström, P. Gerde, A. Hanberg, B. Jernström, C. Johansson, T. Kyrklund, A. Rannung, M. Törnqvist, K. Victorin and R. Westerholm, *Environmental Health Perspective*, 2002, **110**.
- 39 National Institute of Standards and Technology. Diesel particulate matter 1650, [https://srms.nist.gov/certificates/1650.pdf?CFID=4797534&CFTOKEN=dc325aefca268cb0-57C0FEE1-B30D-E6D0-B31D069A1B98CB7D&jsessionid=b43058f04237\\$FE\\$E0o\\$](https://srms.nist.gov/certificates/1650.pdf?CFID=4797534&CFTOKEN=dc325aefca268cb0-57C0FEE1-B30D-E6D0-B31D069A1B98CB7D&jsessionid=b43058f04237$FE$E0o$) (last accessed, July 2006).
- 55 40 K. Pointet, N. F. Renougonnord, A. Milliet and P. Jaudon, *Bull. Soc. Chim. Fr.*, 1997, **134**, 133-140.
- 41 W. F. Rogge, L. M. Hildemann, M. A. Mazurek, G. R. Cass and B. R. T. Simoneit, *Environ. Sci. Technol.*, 1993, **27**, 636-651.
- 42 R. N. Westerholm, J. Almen, H. Li, J. U. Rannug, K. E. Egeback and K. Gragg, *Environ. Sci. Technol.*, 1991, **25**, 332-338.
- 60 43 National Institute of Standards and Technology; URban Dust 1649a, <https://srms.nist.gov/certificates/1649A.pdf?CFID=5791457&CFTOKEN=e1e2080f30c3742c-C2D93D2C-F38F-3BC8-E16383E4588518C2&jsessionid=b43052afba4a78515735> (last accessed, July 2006)
- 44 H. H. Mi, W. J. Lee, T. L. Wu, T. C. Lin, L. C. Wang and H. R. Chao, *J. Environ. Sci. Health Part a-Environ. Sci. Eng. Toxic Hazard. Subst. Control*, 1996, **31**, 1981-2003.
- 65 45 T. Alsberg, U. Stenberg, R. Westerholm, M. Strandell, U. Rannug, A. Sundvall, L. Romert, V. Bernson, B. Pettersson, R. Toftgard, B. Franzen, M. Jansson, J. A. Gustafsson, K. E. Egeback and G. Tejle, *Environ. Sci. Technol.*, 1985, **19**, 43-50.
- 46 E. Manoli, A. Kouras and C. Samara, *Chemosphere*, 2004, **56**, 867-878.
- 47 J. C. Sagebiel, B. Zielinska, P. A. Walsh, J. C. Chow, S. H. Cadle, P. A. Mulawa, K. T. Knapp and R. B. Zweidinger, *Environ. Sci. Technol.*, 1997, **31**, 75-83.

Supplementary Material (ESI) for Journal of Environmental Monitoring  
This journal is © The Royal Society of Chemistry 2007

- 70 48 R. Westerholm and H. Li, *Environ. Sci. Technol.*, 1994, **28**, 965-972.  
49 H. H. Yang, L. T. Hsieh, H. C. Liu and H. H. Mi, *Atmos. Environ.*, 2005, **39**, 17-25.  
50 B. M. Jenkins, A. D. Jones, S. Q. Turn and R. B. Williams, *Atmos. Environ.*, 1996, **30**, 3825-3835.  
51 S. V. Kakareka and T. I. Kukharchyk, *Sci. Total Environ.*, 2003, **308**, 257-261.  
52 N. T. K. Oanh, L. Nghiem and Y. L. Phyu, *Environ. Sci. Technol.*, 2002, **36**, 833-839.  
75 53 A. Christensen, R. Westerholm and J. Almen, *Environ. Sci. Technol.*, 2001, **35**, 2166-2170.  
54 Z. D. Wang and M. F. Fingas, *Mar. Pollut. Bull.*, 2003, **47**, 423-452.  
55 A. O. Barakat, *Bull. Environ. Contam. Toxicol.*, 2003, **70**, 174-181.  
56 S. V. Kakareka, T. I. Kukharchyk and V. S. Khomich, *Environ. Pollut.*, 2005, **133**, 383-387.  
57 M. Bundt, M. Krauss, P. Blaser and W. Wilcke, *Journal of Environmental Quality*, 2001, **30**, 1296-1304.  
80 58 P. M. Fine, G. R. Cass and B. R. T. Simoneit, *Environ. Sci. Technol.*, 2002, **36**, 1442-1451.  
59 B. K. Gullett, A. Touati and M. D. Hays, *Environ. Sci. Technol.*, 2003, **37**, 1758-1765.  
60 M. D. Hays, C. D. Geron, K. J. Linna, N. D. Smith and J. J. Schauer, *Environ. Sci. Technol.*, 2002, **36**, 2281-2295.  
61 A. Khalfi, G. Trouve, R. Delobel and L. Delfosse, *J. Anal. Appl. Pyrolysis*, 2000, **56**, 243-262.  
62 R. D. McDonald, B. Zielinska, E. M. Fujita, J. C. Sagebiel, J. C. Chow and J. G. Watson, *Environ. Sci. Technol.*, 2000, **34**, 2080-2091.  
85 63 W. F. Rogge, L. M. Hildemann, M. A. Mazurek, G. R. Cass and B. R. T. Simoneit, *Environ. Sci. Technol.*, 1998, **32**, 13-22.  
64 J. J. Schauer, M. J. Kleeman, G. R. Cass and B. R. T. Simoneit, *Environ. Sci. Technol.*, 2001, **35**, 1716-1728.  
65 Hogg, D.; Barth, J.; Favoino, E.; Centemero, M.; Caimi, V.; Amlinger, F.; Devliegher, W.; Brinton, W., and Antler, S. *Comparison of Compost Standards Within the EU, North America and Australasia. Main Report*. The Waste and Resources Action Programme (WRAP); Banbury UK, 2002.  
66 Swiss Confederation, *Ordinance of 18 May 2005 on the Reductions of Risks linked to Chemical Products (ORRChem)*, Swiss Confederation, Bern, 2005.  
90 67 French statutory standard *Organic soil improvers - Designations, specifications and marking. NF U44-051*, 2006.
